# Supplementary material for: SMARCB1 Deficiency Integrates Epigenetic Signals to Oncogenic Gene Expression Program Maintenance in Human Acute Myeloid Leukemia
Source: Oxford University Press journal article supplement (doi:10.1158/1541-7786.mcr-17-0493), 2018-02-26
Supplement: 15417786mcr170493-sup-189047_3_supp_4575391_p49z4w.xlsx [file 15417786mcr170493-sup-189047_3_supp_4575391_p49z4w.xlsx]

## Sheet: SMARCC1+H3K27Ac_AML
Gene Name (shared in 3 AMLs)
FAM110C
AC144568.2
FAM138C
FAM138A
RP11-683L23.1
AC008993.1
FAM138F
OR4F17
CBWD1
SCGB1C1
PLCXD1
DOCK8
DUSP22
DIP2C
FBXO25
CHL1
VPS53
ERICH1
KANK1
ENOSF1
NINJ2
WNK1
YES1
LARP4B
AP2A2
ABR
ERC1
SPON2
CRLF2
ADARB2
CLPTM1L
LPCAT1
CNTN6
ASMTL
SLC35E2B
WNT5B
GMDS
ADIPOR2
MYT1L
SMARCA2
MYOM2
PKD1
CACNA1C
TGM3
SNX8
METTL16
RNF4
CNTN4
MYLK4
CSMD1
GNA12
KIAA0020
SERPINB1
HTT
S1PR4
CRBN
RFX3
RPS7
C6orf145
DLGAP1
SUMF1
CREBBP
RNF24
PARP11
SMOX
RRM1
SDK1
SETMAR
STX18
FOXK1
PRNP
CDYL
AJAP1
AKR1E2
JAK2
STK32B
ZNF594
ARL8B
FAM86A
NLRP1
KIAA0947
PDCD1LG2
GPCPD1
KIAA1432
ANO2
CRMP1
FBXO18
F13A1
MCPH1
AL137145.1
PRKCQ
DNAJC11
KDM4C
C7orf28B
GRM7
EMR1
TBC1D14
AC025278.1
CMPK2
RNF144A
STS
C1GALT1
SORCS2
LRRC30
ZNF705G
SPAG11B
RP11-1118M6.1
ACSM4
ADCY2
VCX
DEFB107A
RPA3
AC006465.3
TXNDC5
C9orf123
CNTROB
MTRR
HAO1
NECAP1
SLC2A14
GLCCI1
EEF1E1
PLCB1
AC068353.1
PTPRD
ZNF705A
RERE
NXPH1
CLEC6A
ZNF414
MFHAS1
OR2Z1
KIDINS220
ZNF558
A2ML1
USP7
NDUFV2
SRGAP3
SLC2A5
PLCB4
ANKRD12
TWSG1
RP11-1396O13.13
TNKS
WEE1
SWAP70
ZNF812
CLECL1
SLC2A9
CD69
TEKT4P2
GRIN2A
SBF2
UBE4B
KLRD1
AMPD3
CLNK
GCNT2
FAM38B
CDKN2D
TPTE
PHF14
CELF2
CTNND2
LDLR
ARHGAP6
NEDD9
ROCK2
SLC35G4
RMI2
E2F6
USP6NL
THSD7A
RP11-677O4.1
ETV6
USP47
CHMP1B
C10orf47
MPPE1
LPIN1
RP11-166B2.1
HIVEP1
MAP2K4
FAM86B1
TMEM106B
DHTKD1
CIDEA
AC130352.1
PPARG
SCIN
TYRP1
PHACTR1
CPPED1
TRIB2
PTPN2
PRAMEF4
CEP192
TMSB4X
PRAMEF6
IQSEC1
SPTLC3
SHISA9
WI2-2994D6.2
EMP1
PRAMEF5
GFOD1
PRAMEF9
RAB28
AC134882.1
PRAMEF15
RANBP9
ESF1
RNMT
C9orf146
DNAH5
SPON1
PRDM2
TRIO
MKL2
DGKB
RRAS2
GLRA2
SGCZ
MACROD2
ATF7IP
POTEC
ANKRD30B
FAM105B
C3orf19
PLBD1
ANKH
NOMO1
DCLRE1C
NR2C2
PDXDC1
INSC
RRN3
NBAS
JARID2
AGMO
ASB9
C1QTNF7
RP11-82O18.1
FAM18B2
AKAP8
DTNBP1
FBXL5
ANKRD28
C9orf93
DDX1
CD38
EPS8
FAM188A
SAMSN1
MSR1
NCOR1
AF165138.7
AC006035.2
DERA
GALNTL2
AP000525.1
TAPT1
SOX6
ABCC6
SLC15A5
NOMO3
NRIP1
BNC2
OR11H1
LDB2
RP11-467M13.1
MGST1
PTER
RFTN1
CCDC144A
DAZL
PLCL2
AGR2
CUBN
MST1P9
RPS13
XYLT1
USP25
CNTLN
PIK3C2A
XKR3
TBC1D5
GAB4
PEMT
FGL1
PCM1
SNX13
NCAPG
ASAH1
LCORL
RERGL
BCL2L13
SATB1
HDAC9
RP11-1212A22.2
CACNB2
ADAMTSL1
NOMO2
PSD3
FAM18B1
PRPSAP2
SMG1
AC007952.1
TMC7
AC007952.2
RRAGA
AC106017.1
PLIN2
KCNH8
ESCO1
C21orf91
SH2D4A
CSGALNACT1
PLEKHA5
CDH18
CHODL
TWISTNB
C10orf112
AL589743.1
CAPZB
LPL
TMEM196
SLC24A2
RIN2
ID4
EFHB
NAV2
SLC18A1
POTEM
PLXDC2
WDR35
RPS6KA3
SGOL1
SLIT2
OR4M1
ZNF486
OR4N2
GGTLC3
ITGB8
PDE3A
RALGAPA2
CDKAL1
MLLT3
ABCB5
KIAA1797
ZNF737
KCNIP4
USP22
C2orf43
PTPLAD2
C18orf45
SLCO1B7
RNASE10
PI4KA
NPC1
EIF4G3
MAP2K3
XRN2
NPIPL3
SP4
C17orf51
TTC39C
LATS2
GGT2
METTL9
ZNF385D
OTOA
HIC2
NBPF3
XPO7
RP11-645C24.1
ZNF100
CHD8
CDH12
ZDHHC20
ZNF43
HRH4
DNAJC1
MAPK1
ZNF257
NCAM2
OR4N4
GPR125
DMRTA1
STEAP1B
RP11-368J21.2
KIAA0528
HS3ST2
GOLGA6L1
ZNF521
ETNK1
NIPA1
GOLGA8IP
UBE2E2
AC091565.1
KDM1A
BCR
SOX5
PRDX4
KLHL29
GOLGA6L2
ELAVL2
TAF4B
ZNF675
PPARGC1A
KIAA1217
SACS
IGLL1
RPSAP58
ATAD2B
EIF2S3
ADAM28
ZNF254
ADAMDEC1
IZUMO3
MIPEP
SRSF10
CABIN1
DHRS4L2
CDH10
C15orf2
AL136295.1
DHX15
ITSN2
CHST9
GGT5
MPP6
NCOA1
LUZP2
ARHGAP21
CST7
OSBPL3
BCAT1
SRRM1
GGT1
CMAHP
PI4K2B
LRMP
DOCK5
STXBP6
CASC1
ABHD12
RNF17
TUSC1
SYF2
HS3ST4
CDH2
UBE3A
DTNB
IFLTD1
NFE2L3
MYO3A
SSPN
PDIK1L
BTN3A3
TBC1D19
ITPR2
APBB1IP
ZNF322
C7orf71
SKAP2
STIM2
CDH9
MRPL39
ARID1A
PDSS1
NEK10
HIST1H2BJ
BBOX1
C12orf71
CCDC34
APP
GPR12
STK38L
SLC9A1
ZNF184
PBK
TAX1BP1
PPFIBP1
RAB18
LINGO2
JAZF1
RBKS
BRE
RP11-180C1.1
POLR1D
EFCAB5
CMC1
SSH2
OCA2
RP11-57A19.3
CCDC91
EYA3
AZI2
EIF3CL
MPP7
NSRP1
HERC2
AC091304.2
EXTL3
PAN3
EIF3C
CPD
PHACTR4
CTB-134H23.1
TTC28
AC138749.1
FLT1
WAC
AC055876.1
AC055876.2
DSG2
AC009093.1
CRLF3
RBMS3
RUNDC2C
RNF135
CHN2
FAR2
EPB41
RP11-231C14.2
RP11-345J4.3
NF1
RP11-231C14.4
KREMEN1
AC009086.1
MTUS2
FRG1B
RNF125
TMEM66
KCNA4
SVIL
SLC7A1
SLX1A
RP11-347C12.3
N6AMT1
KIAA1462
ZNRF2
LRRC37B
PRKD1
UBL3
GOLGA8J
YPEL5
PCDH7
C19orf2
MTMR3
FAM7A3
RHOT1
AC120045.3
HORMAD2
C21orf7
CXorf21
AC135731.1
TGFBR2
BACH1
ZNF536
CHRFAM7A
MAP3K8
AC019322.1
C18orf34
DCDC5
AC026150.1
CAPN13
IPO8
CHRNA7
ASXL1
MYO1D
SCFD1
ZNF438
FAN1
DDX11
ALOX5AP
SPACA3
GRIK1
DROSHA
CLDN17
CCDC129
TSHZ3
HECTD1
NRG1
STT3B
NKAIN1
AL117340.1
HEATR5A
C2
PDE1C
OTUD7A
DTNA
AC034105.1
AC142381.2
RXFP2
GOLPH3
AC133485.1
MEMO1
KIF5B
SLC30A6
ACO1
PTP4A2
ZFR
TP53TG3
CMTM7
MAPRE2
TIAM1
BICD1
CMTM6
SUB1
ARHGAP5
KPNA6
FGD4
DYNC1LI1
FRY
BIRC6
FAM7A1
RP11-632K20.1
AC123768.3
TTC27
FBXO7
AC142086.1
KBTBD2
AC142086.2
FKBP9
HLA-DPA1
TCP11L1
NT5C3
SCAF4
TP53TG3B
CSTF3
ITGB1
PIGU
PDS5B
NFX1
FBXL2
HIPK3
NPAS3
RFFL
C19orf40
LTBP1
NRP1
ANKRD18B
RPRD1A
CLASP2
RASGRP3
AC140658.1
SLFN12L
FAM98A
AC133561.1
PDCD6IP
LMO2
UQCC
CAPRIN1
C1QTNF3
TAF15
KIF24
EGLN3
NUDT3
PHF20
C18orf10
TBC1D3B
CCL4L1
TBC1D3C
C6orf106
CCL4L2
LSM14A
IFNAR1
GOLGA8A
TBC1D3H
UHRF1BP1
CELF4
TBC1D3G
PDHX
DPY19L1
ITSN1
UNC5D
CD44
SLC1A2
PPARD
AATF
CREM
FAM177A1
NBEA
ARPP21
SPEF2
CCNY
TOM1
ATPBD4
SRPK1
SYNRG
KIAA0319L
CLIC6
RALGAPA1
MAPK14
BRPF3
EEPD1
CLTA
NADKD1
RUNX1
CXorf30
TBC1D3F
DTHD1
MRPL45
STK38
CRIM1
MELK
ARHGAP23
THRAP3
RPRD1B
MYH9
FEZ2
BPI
NIPBL
ELMO1
RALGAPB
STRN
ZCCHC7
C5orf42
KIAA1239
NCF4
TMEM217
C4orf19
WDR70
MEIS2
C3orf35
FBXL20
RELL1
ITGA9
RAB11FIP1
CTDSPL
EPDR1
CLDN14
TBC1D1
TMCO5A
TTC6
WHSC1L1
FAM82A1
STARD3NL
TRPC4
INPP5B
TTC3
PLA2G6
FAM98B
SEPT7L
DYRK1A
PLEKHA2
VPS41
HNRPLL
TLR1
UFM1
OSMR
RICTOR
ADAM9
CNTNAP3
CPNE8
KLHL5
WDR48
C15orf53
CX3CR1
RFC1
APOBEC3A
DAB2
PIK3C3
MOBP
MAP4K3
KCNJ15
MACF1
TOP1
RALA
KIF21A
ERG
EIF1
PLEKHG2
CDK13
LHFP
CHD6
ETS2
COG6
C7orf10
MFSD2A
CAP1
STAT3
ZNF621
SLC8A1
FAM75A3
NSUN7
TTC33
WRB
ZNF658
SYT4
SMAP2
MKL1
UNC5CL
CNTN1
AARSD1
APBB2
FOXO1
FAM75A4
LIMCH1
PDZRN4
INHBA
ELF1
ANK1
RANGAP1
NDUFAF1
OXCT1
CASK
KAT6A
NAA16
SETBP1
MAPKBP1
LRFN5
MEI1
POLB
SREBF2
KIAA0564
GHR
CEACAM3
EML4
ANKRD20A2
ATP8A1
UBR2
YAF2
TOX2
DGKH
CBWD7
RNF170
SLC14A2
CCNYL2
C7orf25
C5orf39
ANKRD20A3
ZNF131
SERINC3
TTBK2
PKIG
SLC14A1
HMGCS1
PACSIN2
SNRK
UBR1
MAOA
ZFP36L2
C5orf34
THADA
AC091132.1
EPSTI1
PLEKHM1
AC091132.2
FAM75A6
HSD17B12
CNTNAP3B
C7orf44
ADAMTS20
C18orf25
PPIP5K1
ZNF487P
SPDYE1
TMEM117
KCTD8
LRRC37A
ARL17B
PARVB
LRRC37A2
ARL17A
CAMKMT
NSF
SUPT3H
RP11-160N1.10
SPG11
SERP2
FAM27C
TSC22D1
CDC27
C17orf57
RUNX2
UROD
C10orf25
NUFIP1
AC040934.1
NPEPPS
MIS18BP1
FAM27A
SACM1L
ZMYND8
SQRDL
PHF21A
FAM21C
NCOA3
MAST2
SCAF11
AGAP4
AL162731.1
ANKRD26P1
SLC38A1
PTPN20A
SMAD7
ATG13
LCP1
SLC38A2
DYM
FAM35B
KIAA0226L
SYT15
GPRIN2
DNAJA2
GPR110
C11orf49
PPYR1
PCBP3
SETD2
LRCH1
TNFRSF21
TNS3
AL953854.2
PREX1
FAM113B
COL6A1
MDGA2
COMMD8
CD2AP
ARFGEF2
CELF1
SEMA6D
BBC3
ANXA8L2
FAM117A
NUP160
FAM21B
MAP4
C6orf138
PTPRJ
FBXO11
ABCC12
UPP1
ABCA13
AGAP9
FAM25G
ANXA8
KIAA0146
SLAIN2
SIAH1
SUCLA2
FRYL
FOXN2
DUT
KLRAQ1
MEX3C
PRKDC
PTPN20B
CWH43
CEP152
AC084851.1
SPAG9
AGBL4
PTPN1
FAM25C
NME1
CYSLTR2
BEND5
PTPN20C
USP4
UTP18
FNDC3A
LMBR1L
VWC2
EMB
DCC
MST1
RNF123
CDADC1
C15orf33
CAB39L
C8orf22
ZPBP
DTWD1
PARP8
RBM5
POLE2
NRXN1
IKZF1
RACGAP1
HDC
GRB10
DLEU1
SNTG1
MAP4K5
AC102948.1
PARG
SALL1
COBL
DOCK3
AP4E1
AGAP8
DLEU7
ABHD12B
AGAP7
RNASEH2B
TSHZ2
TIMM23
DAZAP2
RNF11
AGAP6
SLC4A8
DMXL2
FAM21A
KIF2B
C18orf54
PKHD1
INTS6
SCN8A
SIGLEC6
OSBPL9
TMOD3
SGMS1
MCM3
ZNF217
C18orf26
PAQR8
NRD1
MAPK6
RP11-463J10.2
BTF3L4
NEK3
NDUFS4
ARPP19
TXNDC16
ZCCHC11
PRKG1
TCF4
CKAP2
ST18
ONECUT1
CHD9
ERO1L
HNRNPA1L2
ZNF83
FAM150A
RBL2
DDHD1
HUWE1
AKTIP
ARL15
OLFM4
ZNF665
AC006305.1
ASB3
PCTP
ATF7
TXNL1
ANKFN1
UNC13C
RP11-45H22.3
ACYP2
WDR7
LNX1
CBLN4
SKIV2L2
SPTBN1
FAM83B
TRIM48
RGS20
C17orf67
LAIR1
HCRTR2
CHIC2
EML6
RSL24D1
RTN4
KIAA0748
MSI2
KIT
USP24
CCDC88A
PCDH15
VOPP1
NEDD4L
CCDC104
DYX1C1
FBXO34
AC022431.2
COL21A1
PNPT1
TBPL2
NEDD4
TMEM165
DST
RFX7
BBS2
UBQLN2
CCDC66
PELI2
TEX9
NUP93
TIMELESS
PPM1E
ARHGEF3
ZNF280D
ZNF451
SPIN3
PPAP2B
NACA
HSD17B6
FAM192A
TCF12
ZNF835
DNAH12
YPEL2
GNAS
PMAIP1
ZXDB
DHX40
PLK2
DAB1
ZWINT
RPS6KB1
VRK2
AC005702.1
PCDH17
CA4
PDE4D
ALDH1A2
FANCL
XRCC6BP1
USP32
C17orf64
LIPC
APPBP2
ACTR10
C3orf67
CDH20
PSMA3
ARID4A
OMA1
KIAA0586
ADAM10
SLTM
NSMAF
DAAM1
FAM81A
FGGY
BRIP1
FHIT
RP11-272B17.2
TNFRSF11A
BNIP2
SLC16A7
RTN1
TFAM
DIAPH3
AC053481.1
BICC1
PHLPP1
TLK2
C14orf135
MRC2
BCL11A
PPM1A
RORA
BCL2
TDRD3
PAPOLG
TANC2
CA8
PTPRG
USP34
KIF2A
CCDC6
SERPINB10
SERPINB8
PRKCH
IPO11
PCDH20
ANK3
CDH8
CLVS1
VPS13C
LPHN3
ICAM2
HIF1A
MTRNR2L9
FAM19A2
TEX2
ASPH
SMURF2
SLC3A2
SPIN4
USP15
RHOBTB1
KHDRBS2
TLN2
LRRC37A3
EHBP1
DOCK7
GNA13
HTR1A
SLC22A9
PPM1H
ATG4C
KCNH5
CDH7
C10orf107
ATL3
RTN3
WDPCP
APH1B
ARID5B
CEP112
USP3
PPP2R5E
DPY19L2
MACROD1
HERC1
LGSN
ZC4H2
PGM1
UGP2
CWC27
ZNF365
VPS54
CDH19
ZNF138
PHF3
SRGAP1
CDH11
EGR2
ADAMTS9
EYS
AFTPH
ADAMTS6
TECRL
CENPK
JMJD1C
CAPN1
CACHD1
RBPMS2
ERBB2IP
DSEL
REEP3
JAK1
CEP68
VKORC1L1
PSMD12
SREK1
ACTR2
FAM75A7
CYP7B1
LEMD3
TPST1
NOL11
MSRB3
DNAJC6
TMX3
BPTF
PACS1
FUT8
LEPR
RAB11A
PDE4B
TYW1
CD180
LLPH
RP11-262H14.4
MTFR1
PDE7A
HELB
MEIS1
GRIP1
ANKRD13D
ABCA10
TCTEX1D1
GPHN
CD226
MIER1
OPHN1
MAP2K6
PIK3R1
VCPIP1
SGK3
ETAA1
CAND1
CTNNA3
ATP6V1D
RTTN
FAM27B
MAP2K5
ANKRD20A1
RP11-195B21.3
SOCS6
FAM19A1
ARFGEF1
C1D
CENPC1
PPP6R3
PNO1
SLC30A5
RAD51B
PPP3R1
UBA6
AL713998.1
CDK7
FEM1B
ITGA11
PLEK
APLF
GTF2H2C
ARHGAP25
CORO2B
ANP32A
AUTS2
FOXD4L6
CBLN2
ZFP36L1
SERF1B
C8orf34
SMN2
FRMD4B
BAI3
DNAJC12
NFAT5
CPSF6
MITF
FRS2
ANXA4
RP11-419C5.2
KIAA0247
LRRC7
TEX11
UGT2B28
PDPR
PPFIA1
SERF1A
CLEC18C
NAIP
EXOSC6
GTF2H2
CBWD5
LMBRD1
COL19A1
SULT1B1
CNOT2
KLHL1
TGFA
HYDIN
CTH
PGM5
UACA
FOXP1
NCOA2
FAM135A
PCNX
SMAP1
ZNF23
FAM86C1
ZNF638
TSPAN8
RUFY3
DYSF
CALN1
SIPA1L1
ZNF366
MOBKL1A
FBXO15
PROK2
DCK
NEGR1
OGFRL1
SLC4A4
HP
TNPO1
PMFBP1
FCHO2
TBC1D15
POM121
RYBP
GC
TRHDE
FCHSD2
EXOC6B
NSUN5
TMEM104
BTF3
SHQ1
GOLGA6B
ADPGK
NPFFR2
ZFHX3
FAM168A
C18orf62
PDZRN3
TRPM3
C2CD3
NUMB
NCF1
GTF2IRD2
RP11-17M16.1
TET3
TMEM2
POLD3
STAG3L2
CNTN3
GATSL1
AC009053.1
CLEC18B
ANKRD31
MCU
GTF2IRD2B
COL4A3BP
ZDHHC15
CXCL6
CXCL1
GATSL2
FA2H
POC5
STAG3L1
ZNRF1
POM121C
MTHFD2L
TMC1
SEC14L1
GDPD5
YLPM1
AGAP5
KCNC2
AREGB
UVRAG
GABARAPL2
ALDH1A1
IQGAP2
AC015804.1
C10orf55
SIN3A
ANXA1
COL12A1
ZNF717
GLIPR1
C2orf3
ROBO2
HSPB1
ADK
ZP3
AC019294.2
TTLL5
UBE2Q2
S100Z
C11orf30
POMZP3
CNTNAP4
SENP6
NRG4
PDE8B
KAT6B
HNF4G
G3BP2
ACER3
SALL3
ST6GALNAC3
CYTH1
ATP9B
FGL2
OSBPL8
AC007000.1
MON1B
PAK1
RORB
SCAPER
PTPN12
ZDHHC17
KCTD12
CSRP2
ST6GALNAC5
CLNS1A
TSPAN3
RSBN1L
RSF1
AC068473.1
PHTF2
E2F7
LRRTM4
ZFHX4
INTS4
MYCBP2
C10orf11
OSTF1
MAGI2
HTR1B
PEX2
LHFPL2
SPTLC2
ARSB
WWOX
NARS2
AC104758.1
NAV3
SLAIN1
TBC1D2B
ODZ4
PCSK5
CXCL13
DNAJB4
CNOT6L
ROBO1
KCNMA1
MRPL1
FRAS1
CMYA5
RFK
TBX22
PRUNE2
SYT1
ELTD1
CTNNA2
PHIP
BMP2K
NRXN3
GNAI1
HMGN3
VPS13A
BRWD3
PAWR
MTHFS
CD36
PPP1R12A
DYNLRB2
LCA5
GNA14
SH3BGRL2
GNAQ
SEMA3C
SH3BGRL
OTOGL
ACOT12
SPRY2
TBCD
AC005008.2
SSBP2
BCKDHB
ANTXR2
TPD52
CEP128
FAM108C1
AC139099.1
ATG10
HGF
CMIP
FAM22B
CACNA2D1
C4orf22
FAM22E
GBE1
TMC3
PPFIA2
LPHN2
PLCG2
PAG1
SEL1L
PRKG2
TLE4
RASGEF1B
TMEM167A
PCLO
GOLGA6L10
GOLGA6L9
POU3F4
AC126339.1
AC011295.1
TMTC2
AC010724.1
AC010724.2
HNRNPD
NRG3
DLG2
UBE2CBP
EDIL3
FAM103A1
SEMA3A
SEC31A
PLAC8
ME1
COQ2
HELQ
SATL1
TTLL7
SLITRK1
FAM175A
AGPAT9
SUCLG1
PRKACB
SEMA3D
USP10
KIAA1009
GOLGA6L4
RPF1
CSPG4P5
CADM2
SSX2IP
KCMF1
SYTL2
DACH2
WDFY3
KIAA0182
RALYL
PICALM
AKAP13
IRF8
C11orf73
LRRCC1
FAM190B
E2F5
GRM3
FLRT2
ZNHIT6
ME3
NT5E
COL24A1
SLITRK6
ARHGAP24
GKAP1
MGAT4C
KDM3A
CCNH
VPS24
ODF2L
C7orf23
MAPK10
SH3GLB1
RGPD1
PLGLB1
RUNDC3B
WWP1
RP11-322L20.1
HS2ST1
GRID1
DBF4
ADAM22
ZNF292
CNBD1
SLC7A5
AFF1
CTSC
MEF2C
PLGLB2
RGPD2
AGTPBP1
RARS2
ORC3
SLITRK5
MEPE
SPACA1
NTRK3
FAM35A
FAM22A
KITLG
PKD2
RPIA
ABCG2
DET1
CBFA2T3
NOX4
PKN2
FAM22D
MINPP1
GTF2B
ANKRD11
TRIM49
RNGTT
PTEN
FOXN3
FAM13A
DUSP6
POLG
GPR98
LRRC8B
CHORDC1
ATP2B1
UBE2J1
RNLS
DAPK1
GPRIN3
LRRC8C
ANKRD6
CDK14
LRRC8D
ZNF326
ANKRD22
ARRDC3
BACH2
RIPK2
MMRN1
PCDH11X
NBN
FAM190A
LIPA
MAP3K7
RP11-201M22.1
ZNF644
MTERF
C14orf159
AKAP9
SV2B
TMSL3
NECAB1
CKS2
CDC7
GPC5
GADD45G
RP11-763F8.1
FAM133B
CDK6
TRIP11
SLCO3A1
HTR7
RP11-24B21.1
RPAP2
RUNX1T1
PLEKHG7
FAM172A
EEA1
C11orf75
GRID2
FAM174B
PPP1R3C
CHD2
TAF1D
MTF2
FGFBP3
CCDC18
DHFRL1
KIAA1409
GPC6
BCAR3
AUH
C8orf83
MCTP1
CRADD
EPHA7
IDE
PIWIL4
EXOC6
PLXNC1
MCTP2
SPTLC1
ATOH1
SERPINA12
RHOBTB3
SMARCAD1
TGDS
HPGDS
NDUFA12
PDLIM5
KIAA1429
BICD2
PCSK1
SLC25A13
CAST
BMPR1B
MAML2
C14orf49
MANEA
RPA4
CLDN10
JRKL
UNC5C
PLEKHF2
ERAP1
AC073995.2
EPHA6
PDHA2
AC016251.1
ACN9
CYP2C8
KIAA0776
PAPOLA
HIATL1
PTBP2
PTDSS1
FBP2
SDC2
ENTPD1
MMS22L
AC010859.1
ANKRD36
MBNL2
RGMB
CHD1
TSPYL5
DPYD
C14orf64
PIK3AP1
TMEM131
ARRDC4
LCOR
VWA3B
C4orf37
FARP1
CNTN5
RP11-181C3.1
TMPO
SNX7
APAF1
STK24
ANKS1B
RAP1GDS1
MGAT4A
FBXL4
TSGA10
EIF4E
HIATL2
LRRC28
FAM174A
C10orf28
MEF2A
PILRB
VPS13B
REV1
TM9SF2
TDRD7
ST8SIA4
AC022692.1
AFF3
TMOD1
AGL
UHRF1BP1L
CCDC76
SCYL2
PCCA
ABI3BP
COX6C
HPSE2
GPR88
CERS3
EMID2
ASCC3
MYL10
EMCN
TRPC6
SLC30A7
LRRK1
DPH5
ABCC2
NFKBIZ
SLCO4C1
CHSY1
GRIK2
SLCO6A1
ZPLD1
PPP3CA
PRKRIP1
PAM
RFX8
RASA4B
ITGBL1
POLR2J3
BIRC2
RASA4
MAP4K4
PPP2R5C
BANK1
POLR2J2
FAM185A
FBXL13
MMP20
PPIP5K2
FAM138E
LRRC17
PMCH
ERP44
NUDT12
TEX10
SLC39A8
BTRC
RELN
TRAF3
UBR5
COL11A1
TMEM182
NFKB1
C12orf42
SLC10A2
C10orf76
SLC9B1
SLC9B2
CENPE
ATP6V1C1
AMY2A
AMY1A
AMY1B
AMY1C
MLL5
SRPK2
RIMS2
NT5C2
ALCAM
CHST11
RINT1
CXXC4
CBLB
C12orf75
DAOA
TGFBRAP1
KIAA1826
NAMPT
FHL2
TET2
NCK2
C7orf74
PIK3CG
PRDM1
EFNA5
ATG5
AIM1
SMC2
SORCS3
RGPD3
TBCK
OR13F1
BBX
OXR1
ALKBH8
CRY1
FBXL17
PRMT6
DLD
NIPSNAP3B
ABCA1
LAMB4
CUL5
DKK2
SLC44A1
FER
SCML4
FSD1L
VAV3
ANGPT1
RGPD4
SORCS1
TMEM38B
DDX10
PAPSS1
TRAT1
PJA2
CMKLR1
NBPF4
TNFSF13B
NBPF6
RSPO2
LEF1
GCC2
EIF3E
LIMS1
ARMC2
SESN1
RANBP2
CCDC138
MYO16
GPSM2
TTC35
TMEM232
ZNF462
CD164
AKD1
RAD23B
GIT2
IRS2
C12orf76
RGPD5
IFT81
AC013271.1
ATP2A2
ANAPC7
STARD4
IMMP2L
CDK19
ELOVL6
PPTC7
C5orf13
COL4A2
KCNA2
RGPD6
LRIF1
ACOXL
ZCCHC16
ALG9
ADD3
TRAF3IP2
MXI1
IL18
FYN
APC
BCO2
RAP1A
TMEM168
ANAPC1
C12orf51
AKAP2
TMEM87B
FBLN7
[truncated: 661 more rows]

## Sheet: SMARCC1+H3K27Ac_Normal
Gene Name (Normal)
RP11-811I15.1
FAM110C
AP001005.1
AC144568.2
XXyac-YRM2039.2
AC093627.6
OR4G11P
Z84812.1
RP11-631M21.1
DEFB125
OR4F5
ABC7-42389800N19.1
IL9RP3
RP11-34P13.8
RP11-143M1.3
AC108004.2
NCRNA00108
DDX11L8
OR4F17
RP11-631M21.2
RP11-683L23.1
DEFB126
USP14
CBWD1
DEFB127
FAM138D
U6
AC079779.7
IQSEC3
ZNF596
5S_rRNA
RPH3AL
ZMYND11
SH3YL1
RP11-598F7.3
SDHA
RP11-63E5.6
C20orf96
DUSP22
THOC1
PPP2R3B
FAM87A
AHRR
AC079779.6
FBXO25
RP11-283I3.4
DOCK8
IRF4
AC105393.1
CHL1
DIP2C
AC226118.1
RP4-669L17.4
Y_RNA
KDM5A
RP5-857K21.15
RP4-669L17.2
VPS53
RP11-411G7.1
RP11-490E15.2
COLEC12
RP1-20B11.2
RP5-857K21.2
CCDC77
RP5-857K21.3
RP5-857K21.5
AC090044.1
7SK
SHOX
HUS1B
AC087431.1
ERICH1
Z98881.1
C18orf56
TPPP
PCGF3
ZDHHC11B
AL669831.1
RP11-206L10.9
NCRNA00115
RP11-206L10.11
U1
EXOC2
HEATR2
AC026740.1
AC090044.2
DMRT1
FAM41C
RP11-218M22.2
CTD-2198K18.1
ZDHHC11
CTD-3212A4.1
RP5-1077H22.1
LARP4B
ADCYAP1
DMRT3
SNTG2
RP11-43F13.3
RP11-363N22.2
AC114808.3
CTD-2281E23.2
GPR146
AC087430.1
AC091729.7
WDR37
RP11-341G2.3
BHLHA9
snoU13
RP11-341G2.1
ERC1
CNTN6
RAD21L1
SNPH
RP11-459D20.1
ADARB2
SDCBP2
AC026214.2
YWHAE
AC073094.4
TOLLIP
C18orf2
CSF2RA
DLGAP2
TPO
NKX1-1
RP11-1398P2.1
SIRPD
AC090043.1
SDHAP3
NCRNA00168
SLC35E2B
SLC35E2
RP11-443B9.1
CLN8
AC090042.1
PXDN
GMDS
RP4-673D20.3
ASMT
RP13-297E16.4
LETM1
AC016292.3
AC018814.1
MAD1L1
RP13-297E16.5
RP11-69C17.1
snoU109
RP11-259O2.3
RP11-204C23.1
MYT1L
RP11-264I13.2
AC090617.1
SMARCA2
RP11-1049H7.1
SMG6
AC009232.2
DHRSX
SGSM2
ASCL2
AC133633.2
DHRSX-IT1
RNPS1
CNTN4
RP1-80B9.2
AC026882.1
RPL26P30
RP11-311B18.1
CACNA1C-IT3
ZBED1
RP11-378A12.1
RP11-125B21.2
CCNF
CACNA1C
RP11-446F3.2
CD99P1
C6orf195
RP11-526P5.1
RNF4
GS1-57L11.1
RP13-436F16.1
RP11-134O21.1
NOP56
AC018685.1
VLDLR
KCNV2
AC141586.1
RPS4Y1
AC018685.2
GNA12
SRRM2
WRNIP1
RP11-89K18.1
CACNA1C-AS1
CSMD1
KIAA0020
AC092117.9
EMILIN2
RP11-420G6.4
RP11-468D11.1
PTPRA
CARM1P1
SERPINB6
RP11-35O7.1
OR1D5
LPIN2
RP11-178D16.1
GNRH2
NQO2
GRK4
AC022002.5
OR1G1
AC006032.1
OR1A2
RP5-1187M17.7
OR1A1
RNU1-22P
OR1D4
RP11-32F11.2
IL5RA
PRDM16
AGPAT5P1
TRNT1
OR3A2
RP11-279L11.1
CRBN
OR3A4
RFX3
TSSC1
PITRM1
HTT
SLC4A11
CTD-2029E14.1
AC087498.1
TSPAN9-IT1
AC109309.5
MYL12B
OR1E1
PRRC2CP1
SPATA22
RP11-30B1.1
RP11-62E14.2
AC026188.1
RP11-121L11.3
RP11-137F15.1
TGIF2LY
AL365202.2
FAM86GP
AC069286.1
TGIF1
TRPV3
RP13-726E6.1
SF3A3P1
RP11-121L11.2
AC127526.2
SLC22A23
RP11-482E14.1
RP11-509J21.1
RP13-726E6.3
RP3-368B9.1
USP12PY
RP11-482E14.2
RPS24P14
RP11-509J21.2
RP5-1092A11.5
RP13-726E6.2
AC005908.1
RP1-223B1.1
OR7E117P
SNORA73
AC011284.3
AC024158.1
AC006111.2
DLGAP1
IRX1
C6orf145
CEP104
RP11-184A2.3
SUMF1
NUP98
CDC25B
DCDC2C
RP11-252M18.3
RP11-184A2.2
AC010084.1
FAM50B
OR4D12P
STIM1
CREBBP
CTD-2287N17.1
EFCAB4B
LRRN1
RP11-464C19.3
AC023480.1
RNF24
SNORA7
AC006207.1
GAPDHP66
AC226119.3
AL138831.1
AC107070.1
EEF2
AC116562.3
RPS29P20
AC116562.2
SDK1
RP11-489M13.1
AC012445.1
GLIS3
RP11-324I10.3
OR55B1P
RP11-433J20.1
SETMAR
RP3-400B16.2
OTOP1
RP11-320N7.1
RP11-374C13.1
RP11-625P7.1
AC068292.1
RP11-437G21.4
RP11-437G21.2
RP11-67B16.1
ADRA1D
RP11-437G21.6
AC026711.1
RP11-437G21.3
RP3-527G5.1
RP11-437G21.5
RP11-437G21.1
CCND2
RP5-1166F10.1
TRIM21
AC024168.1
SLC1A1
FGF23
AC019102.1
PAICSP4
FOXK1
RP4-529N6.1
CTD-2318H23.1
AL121916.1
AP005138.1
AC091153.1
ARRB2
RP5-1068H6.3
AC022311.1
SERBP1P2
PSMB6
DYRK4
CDC37L1
AC023830.1
PRNT
CDYL
PCDH11Y
AKR1E2
NDUFA9
OR51N1P
ITPR1
SNORA31
SLC25A11
CTD-2046I8.1
U2
RP11-221H10.1
RP11-125K10.2
CTD-2247C11.2
AJAP1
SNORA70
BHLHE40
ZFP3
RP5-1116H23.1
VDAC1P6
MTND6P12
RNF216L
STK32B
USP6
AC019176.1
OR52J2P
JAK2
RP11-429A20.3
RBAK
RP11-542C10.1
AKR1C3
AC113331.9
AP005380.1
EIF4A1P2
C18orf42
RP11-499O7.5
FAM86A
ADAMTS16
LYRM4
UBE2D3P1
INSL4
RP11-445P17.3
FARS2
ZFP161
AC073143.1
RP11-745K9.1
RLN2
RPAIN
RP11-319E16.1
RLN1
RP11-382N13.1
RN5-8S7
SNORA20
ZNRF4
RP11-12D24.7
KRT18P10
OR51J1
RP5-991O23.1
NLRP1
NET1
CD274
OR51I1
C4orf6
RP11-154H17.1
KIAA0947
AC026202.5
NTF3
PLAC2
GPCPD1
RP11-733O18.1
RP11-574F11.3
OR52B6
RP1-256G22.1
EPB41L3
TRIM34
C20orf196
AP001032.1
TRIM5
RP11-728L1.1
EVC2
AC010874.1
TRIM22
EVC
C10orf18
KIAA1432
WSCD1
AC108025.2
AC027119.1
ANO2
RP1-182O16.1
TMEM200C
ERMP1
RP11-158A14.1
AC026797.1
AC010729.2
AC012175.1
OR52E7P
MLANA
KIAA2026
AC010729.3
AL035461.1
CCZ1
RSPH10B
RP11-451K18.7
NRN1
CRLS1
DLGAP5P1
AC073479.1
C4orf50
RP11-124B13.1
RBFOX1
RP11-218I7.2
OR52X1P
F13A1
VWF
RP11-575C20.1
AC111177.1
L3MBTL4
ACSBG2
TARDBPP1
RBMY2GP
AL109618.1
RP11-115C21.2
AC091069.1
AIPL1
RP11-307L3.2
CD9
TTTY7
TPD52L3
MCPH1
SNAPC5P1
AC010154.2
AC017053.1
UHRF2
TSPY17P
VCX3A
AC069277.2
RP11-199O14.1
ANGPT2
CNN3P1
ACOT7
PRKCQ
AC105253.1
SRIP3
DNHD1
CTD-2195M18.1
LY86
AGPAT5
MRFAP1
AC021021.1
RP11-554I8.1
U7
FBXO39
GS1-24F4.2
ARHGAP28
AMELY
AL031123.1
ZNF12
RP3-470L22.1
AC097517.1
BTF3P7
TEKT1
KDM4C
GRM7
RSPH10B2
KIAA0232
AC073343.11
DEFA1
DEFT1P
ALOX12
AL392086.1
DEFA1B
RP11-390F4.8
CAMTA1
snoR26
C7orf28B
DEFT1P2
EMR1
GRM7-AS2
RP11-799O21.2
RP4-764O22.1
AC025278.1
SLC16A11
ZNF215
AC017076.5
AF228730.8
AF228730.1
TBC1D14
GPR143P
RP11-740N7.6
SPSB2
AF228730.3
MBD3L5
AC079804.1
MBD3L4
RPS3AP33
RNF144A
TADA2B
MBD3L3
PRKY
AF228730.5
ASGR1
RBMXL2
RP11-367J11.3
RREB1
RP11-393K12.2
OR7E125P
C1S
FAM90A15
FAM90A3
FAM90A4P
FAM90A5
RP11-545E8.1
FAM90A20
LAMA1
DEFB109P1B
RP11-404K5.3
RP11-324J3.1
AC130360.8
C1GALT1
LRRC30
MIR302E
DEFB4B
SYT9
RP11-19D2.1
SSR1
SNORA48
RP11-87M1.1
PEX5
COL28A1
STS
AC010904.1
RP11-185H22.1
CTD-2516F10.2
RP5-988G17.1
RP11-1118M6.1
ADCY2
FAM90A6P
FAM90A7
FAM90A21P
RIOK1
SFMBT2
PTPRM
RBMY2HP
OR7E157P
RP11-1118M6.2
snoMe28S-Am2634
VCX
CD163L1
AL031653.2
RP11-385N23.1
AC084121.14
OR7E154P
RP11-366I21.1
FAM90A14
TTTY16
RP11-157G21.2
GRM7-AS1
AC013460.1
FAM90A18
FAM90A10
AC084121.16
U6atac
CD163
DEFB107A
CYB5R2
AL031653.1
RPA3
AP000897.1
SNORA40
BMP6
OR10AB1P
C9orf123
ZNF736P8Y
AC007161.4
KIN
ZNF705B
RP11-494M8.1
FAM66E
APOBEC1
DEFB109P1
TXNDC5
RP5-836E8.1
FAM90A11
AC092580.1
OR5E1P
HAO1
MTRR
PER3
AC093515.1
RP11-52B19.10
RP1-303A1.1
AC087859.1
PNPLA4
OR10A6
AL009183.1
RBMY2JP
AC068020.2
SLC2A14
RP11-29B9.2
RP11-556O5.1
AC007463.2
GLCCI1
RP5-971N18.3
RP1-126E20.3
RP11-556O5.5
PHKBP1
U8
U3
RP11-215I16.1
AC007464.1
AC018832.1
SLC2A3
AP005227.1
GATA3
CTC1
RIC3
AC006042.6
RP5-997K18.1
EEF1E1
NCRNA00299
VCX2
AC068353.1
RP11-203H2.1
U91324.1
KRBA2
ICA1
PTPRD
ZNF736P10Y
RP11-480D4.5
TMEM114
RP11-266K4.7
AC007128.1
FAM66C
U4atac
CTA-398F10.2
RP11-266K4.1
AP001793.1
ACOX3
NCRNA00279
RP11-543F8.2
AC023481.1
RP11-266K4.12
AL031780.1
AL031655.3
STK33
AC092745.1
RP11-689P11.2
AP001094.1
NXPH1
CLDN23
KRT8P37
MYH10
RP11-113C12.1
RP11-113C12.4
RP11-90D4.2
SCARNA20
HULC
SNORA77
RP11-113C12.5
RERE
RP11-113C12.2
TRIM66
TTTY11
RP11-134K1.3
METTL22
AC091953.2
PLCB1
MFSD6L
MFHAS1
RP11-417J1.4
CAV3
PIK3R5
RP11-314C16.1
RIMKLB
ZNF558
RP5-859I17.2
ST5
KIDINS220
AC009500.2
CTD-2215L10.1
CARHSP1
NTN1
SNORA43
RP3-477M7.6
RP11-143J12.1
RP11-10A14.3
RP11-428L9.2
RP11-10A14.4
MBOAT2
MUC16
AC073648.2
RPS26P3
USP7
RP11-747H12.6
AC073648.1
RP11-354I10.1
RP11-1286E23.1
NDUFV2
SLC2A5
RP11-1286E23.2
RP11-259O18.4
PLCB4
RP11-436I9.3
RP11-1286E23.4
SEMA5A
GS1-519E5.1
A2M
ZNF317
SRGAP3-AS3
AL031785.1
AC087501.1
RP4-660B20.1
RP11-115J16.2
H6PD
RP11-734K21.4
PZP
ASAP2
AL353733.1
TWSG1
GAPDHP68
TNKS
AC108519.1
RP11-473I1.1
RP11-385J23.1
CR381670.1
ZNF699
RBMY3AP
STX8
DEFB131
RP11-58B17.1
C20orf103
OFCC1
RALBP1
RP11-1396O13.21
ZNF177
CTD-2201E9.2
TTTY7B
ZNF266
RP5-1051H14.1
RP5-986I17.2
RP13-392I16.1
SNORA75
RP11-264E23.1
RP11-726G1.1
RP11-527D15.1
RP11-180A12.4
CTD-2143L24.1
PAK7
RAB31
AC060834.2
ZNF562
DRD5
AC060834.3
GRIN2A
RP5-1051H14.2
RBMY2OP
SLC2A9
CR392039.3
ZNF812
AC006238.1
CLEC2D
CLSTN1
NPM1P5
RP11-75L1.1
ZNF846
MSRA
AC006373.1
RPUSD3
GAS7
CR392039.2
CR392039.1
RP5-839B4.8
AC006987.6
TAF1B
AL109754.1
RP5-839B4.7
RP5-933E2.1
RN5-8S6
SBF2
GRHL1
FANCD2
AC091814.3
RP11-748C4.1
CLEC1B
RP11-462C21.1
CR381653.1
UBE4B
SNAP25
KLF11
CLEC9A
MYH13
AC006499.8
RP11-351I24.3
OLR1
GHRL
RP11-87N24.1
MYH4
KLRD1
C20orf94
AC009945.3
RP11-981G7.4
ROPN1L
MYH2
ATF7IP2
RP11-271F18.2
RP11-277P12.10
AMPD3
NAPG
AC009945.4
RP11-277P12.9
CLNK
RNF141
KLRK1
KLRC3
ATP2B2
KLRC2
GCNT2
LYVE1
SCO1
KLRC1
RP11-87N24.3
FAM38B
SNORD112
AC004535.2
AC068775.1
RP1-186E20.1
ATP2B2-IT2
RP11-291B21.2
IGHV1OR21-1
RP11-421B23.2
RP11-177H2.2
DAP
CTR9
MID1
STYK1
RP11-61G19.1
MAK
ZBED5
RP11-421B23.1
CSDA
AC005284.1
SLC25A15P4
CTD-2003C8.2
SYCP2L
RP13-81N3.1
FAM18A
RP11-109M17.1
CYCSP41
AL136452.1
RP4-697P8.3
CIITA
C20orf187
TPTE
RP11-120D5.1
AL050322.1
TAS2R12
BAGE2
TARDBP
MIR572
TAS2R14
MASP2
AC007014.1
VN1R7P
CTNND2
SMARCA4
EXOSC10
MTMR9
RP11-345J13.1
RP11-23D5.1
EIF3FP1
PHF14
PRR4
AC004538.3
MTND5P21
NEDD9
ARHGAP6
TAS2R30
RP4-734C18.1
RPS11P1
ATG7
ROCK2
RP11-711K1.8
RP4-796F18.2
AC006230.4
SLC35G4
THSD7A
RP11-716O23.1
RP11-281P23.1
AC004160.4
PGAM3P
AC009121.1
PRB4
DNAH9
AC026185.1
PRB1
RP11-89C21.3
USP6NL
PTCHD2
TMEM170B
RP11-281P23.2
RP11-711K1.7
E2F6
AL357518.1
VGLL4
GNAL
TRNAG32P
RP11-756D7.1
RP11-74C3.1
RP11-434C1.1
C6orf105
ECHDC3
TXNDC11
RP11-1J7.1
ZNF18
MSL3
RP11-481A20.10
ZC3H7A
C10orf47
RP11-1236K1.11
USP47
U11
ZNF705D
AC005410.1
RP11-1236K1.8
AC096559.1
ETV6
UPF2
MAP2K4
ZNF763
FAM90A2P
BTBD3
ZNF700
ABC11-48400900C8.1
AC087203.1
RP11-166B2.1
SYN2
TMEM106B
RP11-168E17.1
HIVEP1
RP4-796I8.1
FRMPD4
BCL2L14
ANKRD62
ABC12-47043100G14.2
MICAL2
CIDEA
ZNF705C
FAM66A
RP11-71E22.1
AC005358.1
AC026166.2
CDC123
FAM90A25P
GSTM5P1
AC130352.1
RP11-102J14.1
RP11-351I21.10
PA2G4P2
LRP6
VWDE
AC091492.2
AC130352.2
CAMK1D
PPARG
VPS13D
RP11-303G3.6
RPS3AP35
AC013470.6
TSEN2
AC068587.1
RP11-303G3.9
RP11-308B16.2
TYRP1
RP11-352E6.1
LOH12CR1
AL138850.1
RP11-303G3.10
RP11-125M16.1
MYOCD
RP11-308B16.1
RP11-51B23.3
LONRF1
SNX29
ZNF709
SPIRE1
RP11-253I19.3
RP11-352E6.2
PHACTR1
PSMG2
AC096559.2
RP11-252C15.1
AC096750.1
ARL4A
TEAD1
RP11-419C19.3
CREBL2
SNORA64
MIR548Q
RP11-419C19.1
RP11-22A3.2
CAND2
RP5-845O24.8
TLR7
PRAMEF11
TRIB2
ELAC2
PRAMEF4
RP11-419C19.2
RP5-1069C8.2
TLR8-AS1
PRAMEF10
RBMX2P4
SPTLC3
RP11-14K2.1
RP11-382H24.3
RP11-382H24.2
PRAMEF6
AC064875.2
RP11-450I1.4
CEP192
CCDC3
SHISA9
AC003664.1
MPDZ
CTC-497E21.5
AC016553.1
DLC1
RP13-221M14.2
FAM9C
OPTN
AC011288.2
AC134878.1
KIAA1467
ISM1
WI2-2994D6.2
MTND4P7
HSP90AB2P
AC006000.5
EMP1
PRAMEF3
AC093912.1
PHYH
GAPDHP2
RP11-248D7.2
C18orf1
PRAMEF5
RP11-219C24.8
RP11-536O18.1
RP11-219C24.6
RP11-886I11.1
PRAMEF9
ARNTL
BTBD10
PRAMEF13
RP11-145O15.3
CTD-2042D5.1
RP11-886I11.4
TASP1
AC134882.1
C12orf36
RP11-436P7.1
EGFL6
ERCC4
HMGN2P36
BOD1L
XX-FW84067D5.2
AC015842.1
PRAMEF15
FBLN2
RP11-4N23.1
RANBP9
AC005019.3
AC092635.1
TCEANC
PRAMEF14
CACNA1A
RP11-480O10.1
AP001525.2
C9orf146
AC098830.1
DNAH5
CCDC130
TRAPPC2
AC007126.1
RP11-480O10.2
RNMT
RP11-23B7.3
CCDC90A
AC016730.1
RP11-341G5.1
CTB-51A17.1
RP11-510I21.1
RP11-98J9.1
FRMD4A
RNF182
SEL1L2
RP11-341G5.2
ETV1
TPRXL
COX10
RPS3P1
RP11-681N23.1
SPON1
RP11-3G21.1
AC006557.2
RP11-142M10.2
GRIN2B
GEMIN8
PRDM2
TRIO
SCYE1P
RP11-280O24.1
RP11-138H14.1
AC004909.3
MXRA5P1
VN1R21P
RP11-669M16.1
C1orf196
ANKRD20A5P
RP11-397C18.2
MKL2
EEF1A1P26
AC092470.1
XPC
RPS24P1
AL136992.1
DGKB
RP11-359N11.2
TERF1P2
RP11-536I6.2
AC006296.2
AP001464.4
RRAS2
AC022816.2
AC011509.1
ANKRD30BP2
MACROD2
RP11-140L24.3
SGCZ
AC013248.1
ZNF355P
MIR1265
MTND2P31
AJ239321.3
NCRNA00276
RP11-330A16.1
NCRNA00227
ATF7IP
POTEC
FAM107B
RP11-408A13.1
RP11-344F13.1
SNORA63
XGPY
FGF7P2
AC092291.1
CCT6P2
PSMA1
TECR
ZDHHC21
ANKRD30B
RPS10P2
MIR383
RP4-704D23.1
PDE3B
PLBD1
AC135052.1
CTD-2023J5.1
FREM1
C3orf20
ANKRD30BP1
AC005863.2
EMR3
RP11-174G6.1
FAM84A
RBBP4P1
U70984.1
VN1R8P
AC005773.1
GUCY2C
RP11-680G24.1
CYP2R1
ABCC6P2
KAZN
SNX19P1
SUV39H2
AP001465.5
AC068286.1
CDRT7
NOMO1
MOSPD2
OR4K12P
DCLRE1C
POTED
RP11-54D18.2
RP11-719K4.5
CALCA
RP11-680G24.3
NR2C2
MEIG1
GRAMD4P1
RP11-271M1.3
CXADRP1
CPEB2
ERP27
AC006458.3
MIR1972-1
ARHGDIB
FEM1AP1
RP11-699A7.1
NMT2
RP11-508P1.2
TERF1P1
INSC
TTC39B
RRN3
RP11-665G4.1
SFPQP1
AL050335.1
RP1-137K24.1
RERG-IT1
TAB3P1
CYP4F29P
SNX18P13
RP11-1390J18.1
RP11-25G10.2
TUSC3
RERG
ANKRD20A11P
RERG-AS1
RHOT1P2
AGMO
AP005901.1
RP11-82O18.1
PSMA6P1
SNAPC3
MARK2P5
RP11-484O2.1
AC005517.3
NBAS
PTPRO
RP11-32P22.1
RP11-388K2.1
JARID2
AP001347.1
FAM171A1
AC005838.2
UTY
PSIP1
RP11-385D13.1
DTNBP1
LIPI
FBXL7
AL121584.1
ITGA8
C9orf93
TRIM16
RP11-6K23.1
HMGN2P16
ZNF286A
ENSAP1
PPM1AP1
AC005550.3
FHAD1
AD000091.1
HSPA13
DDX1
ANKRD28
RP11-396O20.2
AF130249.5
AC015922.5
AC008278.3
CYP4F12
EPS8
ARPC3P5
RP11-77B22.1
AC006041.1
CD38
TMSB4Y
FAM188A
MIR887
KALP
RP11-442P12.1
ZSWIM7
SAMSN1
AC008271.1
OR10H1
MYH11
RP11-6B19.1
MSR1
PROM1
RP11-401E14.2
VCY1B
AF165138.7
AC090945.1
SOX6
LA16c-4G1.3
AC005971.1
RP1-13D10.5
AC006035.2
LA16c-4G1.4
GALNTL2
AF127936.3
NCOR1
LA16c-4G1.5
LA16c-60H5.7
FTLP19
AP000525.8
RP11-536D16.2
DERA
LA16c-83F12.6
AC010145.4
GRAMD4P2
AF127936.7
PPIAP17
AC006427.1
RPL6P30
AC004741.3
RP11-19O2.4
AC093484.6
AC004741.4
POTEH
AC010723.1
ABCC6
KIF16B
NOMO3
OXNAD1
LA16c-59E1.2
AC078993.1
GMPR
AC073597.1
NEK2P2
LA16c-2F2.8
RFTN1
RP11-517A5.2
BNC2
LA16c-60G3.5
RP11-958N24.3
ISPD
RP1-167G20.2
C21orf116
LA16c-23H5.6
AF127577.12
RP11-13N12.2
RP11-183I6.2
YME1L1P1
RP11-467M13.1
RP11-449L13.2
SOSTDC1
RP11-759L5.2
NLGN4Y
MGST1
RP11-13N12.1
AP000538.1
AC100865.1
LDB2
ATXN1
AP000539.1
CTPS2
CCDC144A
AC005014.5
RP11-260E18.1
ZNF72P
RP11-62F24.1
RP11-424M22.1
UPF3AP1
ANKMY2
C11orf58
LA16c-13E4.3
RP11-197M22.2
AC022596.1
MYO10
AJ006998.2
DAZL
OTOR
AGKP1
AGR2
RNU1-1
RP11-69C13.1
FAM49A
RP1-151F17.1
RSU1
PLCL2
RP5-1195D24.1
AC008069.1
AJ009632.3
AL355149.2
LA16c-17H1.3
RP11-239A17.1
EFHA2
PABPC1P9
NBPF1
PLEKHA7
MPRIP
LA16c-68B10.4
CUBN
CROCCP2
AL137798.3
RP11-468H14.2
RNU1-3
KB-67B5.11
MED13P1
KB-67B5.12
RP3-486B10.1
AL021920.2
ZDHHC2
CYCSP46
XYLT1
PLCL2-AS1
RP11-466H18.2
CNOT7
AC005301.5
AC098592.8
MST1P9
REPS2
RPS13
SLC25A15P5
VPS37A
RP11-576E20.1
AC080094.1
CNTLN
EEF1A1P33
ANKRD62P1
AC090644.1
MTMR7
USP25
TRDMT1
AC005301.8
AC092099.1
CBX1P4
PCSK2
RP11-74N9.1
AC003075.4
XKR3
CTD-2139B15.1
AC090960.1
AC073621.3
HDHD1P1
NUCB2
AC007064.25
AC006548.20
RPS7P6
PSMC1P8
CAP2
TBC1D5
C21orf34
RP11-414K1.3
AL034372.1
AC140076.1
ST8SIA6
MTUS1
CECR7
AC019117.2
SH3GL2
PSMC1P10
AC017060.1
IL17RA
RP11-871F6.2
PADI4
RAD51AP2
RP11-606D9.1
RP11-432M8.17
SNORD74
STSP1
RP11-806O11.1
PTPLA
STAM
NUP153
AC006482.1
PADI6
RP11-454P21.1
AC104451.1
AC104451.2
RP11-390B4.3
FAM184B
CECR3
PCM1
CTA-481E9.1
SMC6
RP11-414P19.1
SNX13
RP3-525L6.2
GEN1
C20orf72
AP000473.5
AC017020.1
ARHGEF10L
KIF13A
LCORL
AC132807.1
PRPS1L1
TPH1
SLC25A18
AC131384.1
RP11-343P16.1
SAAL1
RERGL
AC010082.1
CSRP2BP
ACTL8
AC124242.1
RP11-570H19.2
AP000473.6
BCL2L13
SNORD81
AACP
BEND2
SATB1
DEK
RP11-608B3.1
HDAC9
RP11-1212A22.2
AL353997.3
AC091697.1
RP11-528A10.2
RP4-568F9.7
AL353997.7
AF212831.2
MICAL3
AL353997.9
AC107983.1
PSD3
AC113389.1
ADAMTSL1
NEK4P1
AC107983.3
IGSF21
AC107983.4
RP11-1212A22.5
AC092851.1
RDH14
RP11-1212A22.6
AC036178.1
AC144521.1
PIK3C2G
TSG101
MIR548A1
NOMO2
AC025562.1
UEVLD
AC105765.1
RP11-459D22.1
RPL35P6
ABCC6P1
RP11-504G3.1
FBXW10
CACNB2
SPTY2D1
AC008079.9
RP11-127B1.1
AC105750.1
RP11-137N23.1
ROCK1
RPS15A
CTD-2023M8.1
FAM18B1
RP11-503K16.2
AC008132.1
AC107982.4
EEF1A1P34
PSMC1P9
GGT3P
AC008132.14
AC090286.2
AC008132.12
AC008132.13
GREB1L
AL158150.1
C20orf78
SURF6P1
PLCZ1
RP11-1081L13.3
CTD-2151L9.2
AC106053.1
NSUN6
RP11-81B23.1
CAPZA3
SNORD23
AC004744.3
RP11-1080G15.2
RP1-239K6.1
MRGPRX1
AC007952.1
AC007952.5
SLC24A3
ZNF962P
NPM1P13
AC007952.6
COQ7
RP11-754I20.1
AP000432.2
AC007952.2
MRGPRX2
AC003986.6
RP11-139J15.5
RP11-77P19.2
AC092594.1
AC106017.1
RP11-254A17.1
ZDHHC13
KCNH8
GPR64
NCRNA00285
AC106017.3
ESCO1
RP11-484H12.1
RP11-282K24.1
SH2D4A
RP11-754I20.3
LONRF2P2
RP11-484H12.3
RP11-288D15.1
HSPD1P15
CR383657.2
FERD3L
CR383657.1
PDHA1
CHODL
RP5-1027G4.3
RP11-288D15.2
CSGALNACT1
RP11-536C10.2
AC007091.1
AL049647.1
RP11-686D16.1
RP11-428C19.5
RP11-686D16.2
UBR4
RP11-536C10.5
AC091038.1
AC004448.5
RP11-608O21.1
CDH18
RP11-536C10.6
PLEKHA5
RHOT1P3
ACER2
RP11-38M15.11
RP11-536C10.15
RP11-268I9.1
MAP3K15
C10orf112
AP000998.2
RP11-536C10.10
FAM41AY1
CTD-2311B13.3
CTD-2311B13.1
U4
AL139429.1
RP11-1105O14.1
POTEG
RP11-49L2.1
AEBP2
KRT18P38
CTD-2314B22.1
RP11-94H6.1
RP11-841C19.6
CTD-2311B13.6
TWISTNB
RP11-841C19.1
CAPZB
RP11-146E13.1
RP11-252O2.2
TMPRSS15
RP11-496I2.2
RP1-122P22.2
AC015726.1
SLC24A2
RP11-496I2.4
LPL
AC010096.2
TMEM196
EFHB
PSPC1P1
AC019055.1
RP11-265G8.3
OR11H12
SH3KBP1
AL132821.1
RP4-625H18.2
RP13-585F24.1
RP11-146E13.3
ZNF14
AC007742.3
AL109763.1
OFD1P1Y
GPRC5B
AC004543.2
RP11-405A12.2
RP11-863N1.2
NAV2
AC005062.2
AL589182.1
ID4
AF240627.2
ZNF506
RP11-339D20.1
AC100802.3
RP11-146E13.6
SPECC1
SLC25A15P2
RP1-130G2.1
USP9YP7
CTAGE1
CYCSP32
ZNF93
AC138701.1
POTEM
GPR139
USP9YP6
CISD1P1
TMCO4
AL353147.1
AL512635.1
RP11-244H18.2
AC005062.3
RP11-863N1.1
RP11-244H18.4
USP9YP34
TPTE2
RP11-244H18.3
USP9YP32
TTC32
RP11-536C10.22
AC138701.2
RP11-61K20.1
CASC4P1
WDR35
AP001538.1
RP11-597A11.5
RP11-239H6.2
PLXDC2
ZNF90
MPHOSPH8
TCEB1P12
DBX1
LAPTM4A
AC008088.3
RP11-420O16.2
RP11-173D3.2
PPIAP22
RP11-575A19.2
MACC1
ZNF486
SLIT2
AC008088.2
PSPC1-AS1
OR4N2
AC005083.1
OR4K6P
SRP68P3
XXbac-B33L19.3
CTC-465D4.1
AL157359.4
AC087386.1
AL157359.3
AC015818.9
AC078899.1
AC015818.7
AL158198.1
XXbac-B33L19.6
TCEB1P26
MLLT3
PLA2G5
PSPC1
GGTLC3
AC126603.2
RP11-420O16.1
AC015818.6
ITGB8
AC107622.1
PDE3A
AC015818.3
OR4K16P
AC126603.1
AC015818.1
OR4K15
AP000431.1
OR4Q2
SNORD56
AP000431.2
KIAA0649P2
RP11-492D6.1
RP11-509A17.3
RP11-337N19.1
RP11-108E14.1
OR4L1
PUM2
RALGAPA2
RBBP8
RP11-284H19.1
AC007041.1
AC087499.7
AC106033.1
UBE2L2
OR4K17
AC087499.8
ZNF826P
RP11-701I24.1
EEF1A1P27
HERC2P3
AC011718.1
CDKAL1
RP11-774D14.1
OFD1P4Y
AC126365.1
AC022486.1
KIAA1797
RP3-348I23.3
PACRGL
RP11-4E23.2
AC112777.1
USP41
RP11-697E23.1
CTD-2292M16.2
RP11-467L19.3
ZNF737
THUMPD1
SNORA30
AL157718.1
RP3-348I23.2
GOLGA8DP
NELL1
AC131280.1
TTC5
GJB2
MRPS11P1
AC090774.1
ZNF626
SLCO1C1
AC004381.1
MUL1
RP11-467L19.11
RPL37P4
MED15
RP11-421P23.2
GJB6
C18orf45
NBEAP1
KCNIP4
AC104441.1
LYRM1
C2orf43
SLCO1B3
PTPLAD2
AC005251.4
MTND1P21
ZNF66P
SLCO1B7
RP11-403B2.3
CRYL1
AC007379.5
CXADRP2
OFD1P7Y
RP11-811J10.1
RIOK3
DNAH3
IFNNP1
AP000568.2
NCRNA00237
AC012361.1
TTTY14
ZNF85
RP11-403B2.1
AC078791.1
RP11-810K23.5
RP11-810K23.1
RP11-24P4.1
AL163636.2
C1QBPP
IFT88
ZNF430
RP4-777D9.2
RP11-810K23.3
PLK1S1
NEBL
AC037471.1
IFNA14
CRKL
RP11-374A4.1
ASS1P11
AP000946.2
SLCO1B1
RP1-135L22.1
RP11-609K12.2
AC010872.2
XRN2
CTD-2302A16.2
AC126335.1
RP11-854K16.1
RP11-822E23.1
CTD-2547E10.3
RP11-487E1.1
RP11-823P9.1
CNKSR2
AC022335.1
AC104183.1
EIF4G3
GAPDHP19
RNU1-15P
RP11-84C10.2
AC022716.1
RP11-120A1.1
CTD-3233P19.2
RUNDC2B
AC067959.1
SLCO1A2
XPO4
NPIPL3
ZNF385D
RP11-204E9.1
C17orf51
AC010754.1
BCRP2
KB-1592A4.15
POM121L7
ZNF708
CTD-2547E10.2
RP11-565H13.3
KB-1592A4.13
KB-1183D5.11
AP001171.1
ARHGEF40
AC138951.1
DNAH11
RP11-804N13.1
CTB-31N19.2
AC010137.2
GGT2
RP11-556G22.3
RP11-354P17.9
ZNF493
KB-1183D5.9
PYROXD1
TTC39C
POM121L8P
LATS2
KB-1183D5.13
ZNF429
AC138761.1
RP11-275N1.2
GFRA2
RP11-556G22.2
AL355679.1
KIAA0649P5
RP3-322L4.2
AC011752.1
PPP1R11P1
[truncated: 11,977 more rows]
