# Supplementary material for: SMARCB1 Deficiency Integrates Epigenetic Signals to Oncogenic Gene Expression Program Maintenance in Human Acute Myeloid Leukemia
Source: Oxford University Press journal article supplement (doi:10.1158/1541-7786.mcr-17-0493), 2018-02-26
Supplement: 15417786mcr170493-sup-189047_3_supp_4575397_p49z4x.xlsx [file 15417786mcr170493-sup-189047_3_supp_4575397_p49z4x.xlsx]

## Sheet: Read_Me
Dr. Amitava Sengupta	Column1
SO_7425								Interval Based	Creates a report that contains one line for each aberrant genomic interval.
Experiment Details								Column Header	Description
			No. of aberration calls					Type	Amplification/Deletion
Slide Barcode	Samples hybridized	Worksheet	Amplification	Deletion	Gain	Loss		Chromosome	Chromosome Name
252192441056_1_1	1_Female (Cy5) vs. Promega Female Reference (Cy3)	1_F	15	2	8	0		Cytoband	p or q arm of the chromosome
252192441056_1_2	2_Female (Cy5) vs. Promega Female Reference (Cy3)	2_F	297	2	110	0		Start	The first chromosomal location to which each probe is designed
252192441056_1_3	3_Female (Cy5) vs. Promega Female Reference (Cy3)	3_F	22	1	3	1		Stop	The last chromosomal location to which each probe is designed
252192441056_1_4	7_Female (Cy5) vs. Promega Female Reference (Cy3)	7_F	1	1	2	0		#Probes	No. of probes present in particular chromosome
252192441056_2_1	12_Female (Cy5) vs. Promega Female Reference (Cy3)	12_F	4	32	15	2		Amplification/Deletion	The magnitude of the detected common aberration. Amplifications are positive numbers. Deletions are negative numbers.
252192441056_2_2	13_Female (Cy5) vs. Promega Female Reference (Cy3)	13_F	0	2	4	2		P Value	Measure of Significance
252192441056_2_3	14_Female (Cy5) vs. Promega Female Reference (Cy3)	14_F	1	1	12	4		Gene Names	Genes Involved
252192441056_2_4	18_Female (Cy5) vs. Promega Female Reference (Cy3)	18_F	0	2	1	0
252192441057_1_1	25_Female (Cy5) vs. Promega Female Reference (Cy3)	25_F	1	1	1	0
252192441057_1_2	26_Female (Cy5) vs. Promega Female Reference (Cy3)	26_F	3	7	3	0		In each of these work sheets the number of probes in the chromosome intervals having amplification or deletion in each of respective experiments is provided. Please refer to the column "#Probes" which provides sum of number of probes having amplification or deletion in chromosome interval. The columns "Amplification" / "Deletion" provide amplification and deletion scores.
252192441057_1_3	27_Female (Cy5) vs. Promega Female Reference (Cy3)	27_F	6	1	2	2
252192441057_1_4	28_Female (Cy5) vs. Promega Female Reference (Cy3)	28_F	0	1	2	0
252192441057_2_1	29_Female (Cy5) vs. Promega Female Reference (Cy3)	29_F	7	0	3	2
252192441057_2_2	31_Female (Cy5) vs. Promega Female Reference (Cy3)	31_F	1	1	3	0
252192441057_2_3	32_Female (Cy5) vs. Promega Female Reference (Cy3)	32_F	2	3	3	1
252192441057_2_4	4_Male (Cy5) vs. Promega Male Reference (Cy3)	4_M	0	0	2	2
252192441058_1_1	5_Male (Cy5) vs. Promega Male Reference (Cy3)	5_M	10	3	11	0
252192441058_1_2	6_Male (Cy5) vs. Promega Male Reference (Cy3)	6_M	0	7	2	2
252192441058_1_3	8_Male (Cy5) vs. Promega Male Reference (Cy3)	8_M	1	0	5	3
252192441058_1_4	9_Male (Cy5) vs. Promega Male Reference (Cy3)	9_M	0	3	3	0
252192441058_2_1	10_Male (Cy5) vs. Promega Male Reference (Cy3)	10_M	11	1	10	1
252192441058_2_2	11_Male (Cy5) vs. Promega Male Reference (Cy3)	11_M	2	0	5	0
252192441058_2_3	15_Male (Cy5) vs. Promega Male Reference (Cy3)	15_M	13	1	8	0
252192441058_2_4	16_Male (Cy5) vs. Promega Male Reference (Cy3)	16_M	0	16	0	5
252192435818_1_1	17_Male (Cy5) vs. Promega Male Reference (Cy3)	17_M	2	3	3	1
252192435818_1_2	19_Male (Cy5) vs. Promega Male Reference (Cy3)	19_M	8	9	19	5
252192435818_1_3	20_Male (Cy5) vs. Promega Male Reference (Cy3)	20_M	0	1	3	1
252192435818_1_4	21_Male (Cy5) vs. Promega Male Reference (Cy3)	21_M	1	2	4	1
252192435818_2_1	22_Male (Cy5) vs. Promega Male Reference (Cy3)	22_M	6	1	2	2
252192435818_2_2	23_Male (Cy5) vs. Promega Male Reference (Cy3)	23_M	2	6	3	6
252192435818_2_3	24_Male (Cy5) vs. Promega Male Reference (Cy3)	24_M	2	1	0	0
252192435818_2_4	30_Male (Cy5) vs. Promega Male Reference (Cy3)	30_M	2	1	0	1
Gain - An interval with a higher than normal copy number and a mean log ratio lower than the Gain Threshold.
Amplification - An interval with a higher than normal copy number and a mean log ratio higher than the Gain Threshold.
Loss - An interval with a lower than normal copy number and a mean log ratio higher than the Loss Threshold.
Deletion - An interval with a lower than normal copy number and a mean log ratio lower than the Loss Threshold.
Gain Threshold
The threshold for calling an aberration a gain. The default gain threshold of 2.0 means that aberrations with a mean log ratio between 0 and 2.0 are called as gains and those with a mean greater than 2.0 are called as amplifications.
Loss Threshold
The threshold for calling an aberration a loss. The default loss threshold of -1.0 means that aberrations with a mean log ratio between 0 and -1.0 are called as losses and those with a mean less than -1.0 are called as deletions.

## Sheet: 1_F
Type	Chr	Cytoband	Start	Stop	#Probes	Amplification/Deletion	P_Value	Gene Names
Amplification	chr2	p16.3	51510902	51510961	1	4.62191	1.372e-19	LOC730100
Amplification	chr20	q13.13	49711102	49711161	1	4.03588	1.149e-16
Amplification	chr6	p22.2	25530770	25530829	1	3.68288	3.844e-17	LRRC16A
Amplification	chr14	q31.1	79579214	79579273	1	3.33619	5.229e-17	NRXN3
Amplification	chr16	q12.1	48396306	48396362	1	3.26819	5.558e-18	MIR548AE2, MIR5095, LOC100507577, SIAH1
Amplification	chr4	p13	41652135	41652194	1	2.64791	4.196e-11	LIMCH1
Amplification	chr20	p11.23	18270889	18270948	1	2.63287	4.758e-11	ZNF133
Amplification	chr3	q25.32	157563651	157563710	1	2.4631	4.405e-10
Amplification	chr9	q34.11	131633235	131633294	1	2.45103	1.843e-15	CCBL1
Amplification	chr5	q13.2	73158692	73158751	1	2.30464	2.452e-10	ARHGEF28
Amplification	chr15	q15.1	42758647	42758706	1	2.27225	6.434e-15	ZNF106
Amplification	chr7	p11.2	54676476	54676535	1	2.24516	1.277e-14
Amplification	chr1	q25.2	180244551	180244610	1	2.21063	1.44e-13
Amplification	chr9	p23	10164896	10164955	1	2.09689	5.12e-14	PTPRD
Amplification	chrX	q21.1	84017187	84017246	1	2.04149	1.262e-12
Deletion	chr22	q13.1	39359112	39385485	2	-2.27523	1.172e-16	APOBEC3A_B, APOBEC3A, APOBEC3B
Deletion	chrX	q11.2	64483521	64483580	1	-1.57124	6.256e-10
Gain	chr2	p23.2	29087928	29087987	1	1.96455	3.343e-11	TRMT61B
Gain	chr5	q33.3	155801164	155801223	1	1.69022	8.972e-12	SGCD
Gain	chr6	q21	114573805	114573864	1	1.8213	3.184e-12	LOC101927768
Gain	chr8	q21.11	75661636	75661695	1	1.99742	2.092e-13	MIR2052HG
Gain	chr12	p12.1	24074321	24074380	1	1.59144	5.942e-10	SOX5
Gain	chr12	q24.13	112890753	112890812	1	1.65926	3.878e-10	PTPN11
Gain	chrY	p11.31 - p11.2	2656461	9901314	50	0.670057	9.266e-26	RPS4Y1, ZFY, LINC00278, TGIF2LY, PCDH11Y, TTTY23B, TTTY23, TSPY2, LINC00280, TTTY1, TTTY1B, TTTY2, TTTY2B, TTTY21, TTTY21B, TTTY7B, TTTY7, TTTY8B, TTTY8, AMELY, TBL1Y, PRKY, TTTY16, TTTY12, TTTY18, TTTY19, TTTY11, RBMY1A3P, TTTY20, FAM197Y2P, FAM197Y5P, TSPY4, TSPY8, TSPY3, TSPY10, TSPY1, RBMY3AP, TTTY22
Gain	chrY	q11.21 - q11.23	14061053	28581478	126	0.413276	1.268e-39	GYG2P1, TTTY15, USP9Y, DDX3Y, UTY, TMSB4Y, VCY, VCY1B, NLGN4Y, NLGN4Y-AS1, FAM41AY1, FAM41AY2, FAM224B, FAM224A, XKRY2, XKRY, CDY2B, CDY2A, HSFY2, HSFY1, TTTY9B, TTTY9A, TTTY14, CD24, BCORP1, TXLNGY, KDM5D, TTTY10, EIF1AY, RPS4Y2, PRORY, RBMY2EP, RBMY1B, RBMY1A1, RBMY1E, RBMY1D, TTTY13, PRY2, PRY, LOC101929148, TTTY6, TTTY6B, RBMY1J, RBMY1F, TTTY5, RBMY2FP, LOC100652931, TTTY17B, TTTY17A, TTTY17C…

## Sheet: 2_F
Type	Chr	Cytoband	Start	Stop	#Probes	Amplification/Deletion	P_Value	Gene Names
Amplification	chr2	q22.3	144318827	144374390	3	2.19621	9.121e-26
Amplification	chr2	p25.3	1112915	1151213	2	2.21456	3.661e-24	CLSTN1
Amplification	chr3	q25.33	160576359	160623801	2	2.65334	1.541e-30	SMIM12
Amplification	chr4	q28.1	123814022	123818854	2	2.19295	4.12e-22
Amplification	chr4	q31.21	144108953	144119016	2	2.14467	2.345e-23	SCMH1
Amplification	chr15	q23	68438996	68470804	2	2.8306	7.596e-33	ERI3
Amplification	chr1	p36.23	9161915	9161974	1	3.64329	9.793e-20	USP24
Amplification	chr1	p36.22	9845436	9845495	1	3.34937	2.601e-19	NFIA
Amplification	chr1	p34.3	35324171	35324230	1	2.03947	1.168e-13	CACHD1
Amplification	chr1	p34.3	39179929	39179988	1	2.44422	3.021e-12	LRRC7
Amplification	chr1	p34.2	41582504	41582562	1	4.90155	4.033e-22
Amplification	chr1	p34.1	44784377	44784436	1	2.11139	1.566e-11	SAMD13
Amplification	chr1	p32.3	55563399	55563458	1	2.23699	1.245e-14	EVI5
Amplification	chr1	p31.3	61667627	61667686	1	3.45156	5.934e-18	PTBP2
Amplification	chr1	p31.3	65068470	65068529	1	2.51967	3.03e-16	COL11A1
Amplification	chr1	p31.1	70508127	70508186	1	2.6712	4.156e-16	CSDE1
Amplification	chr1	p31.1	79334194	79334253	1	2.13171	1.336e-11	POGZ
Amplification	chr1	p31.1	84767606	84767665	1	2.39038	2.908e-15	KCNN3
Amplification	chr1	p22.1	93160922	93160981	1	3.57078	3.194e-20	CFAP45
Amplification	chr1	p21.3	97203547	97203606	1	2.40612	6.14e-14	LOC100506023
Amplification	chr1	p21.1	103540241	103540300	1	2.29033	1.03e-14	ABL2
Amplification	chr1	p13.2	115276639	115276698	1	2.29725	3.963e-15	TSEN15
Amplification	chr1	q21.3	151402050	151402109	1	4.2778	2.486e-21	HMCN1
Amplification	chr1	q21.3	154768621	154768680	1	2.1078	6.486e-14	CFH
Amplification	chr1	q23.2	159842177	159842229	1	2.45336	5.63e-14	KLHL12
Amplification	chr1	q25.1	173331056	173331115	1	2.97018	3.931e-18	KISS1
Amplification	chr1	q25.2	179133599	179133658	1	2.53004	2.626e-15
Amplification	chr1	q25.3	184021452	184021511	1	2.27528	3.97e-14	TP53BP2
Amplification	chr1	q31.1	185926188	185926247	1	3.02191	8.191e-18	TSNAX-DISC1, DISC1
Amplification	chr1	q31.3	196623119	196623178	1	2.10651	6.192e-14
Amplification	chr1	q32.1	202878048	202878107	1	2.77201	9.268e-12	SNTG2
Amplification	chr1	q32.1	204163516	204163572	1	2.57571	1.373e-16
Amplification	chr1	q41	217510116	217510175	1	4.30605	1.275e-21	KCNS3
Amplification	chr1	q41	224009016	224009075	1	3.4639	4.797e-20	LTBP1
Amplification	chr1	q42.2	231788307	231788366	1	2.05326	9.697e-13	RASGRP3
Amplification	chr1	q43	239721730	239721789	1	2.21976	8.505e-15	LINC01317
Amplification	chr2	p24.2	17447798	17447857	1	2.59375	8.906e-17
Amplification	chr2	p24.2	18075821	18075880	1	3.04838	1.156e-18	MAP4K3
Amplification	chr2	p22.3	33447148	33447201	1	2.78009	1.145e-17
Amplification	chr2	p22.3	33696657	33696716	1	4.24508	2.384e-21	PAPOLG
Amplification	chr2	p22.3	34264214	34264273	1	2.52619	2.695e-16	PCBP1-AS1
Amplification	chr2	p22.3	35446341	35446400	1	2.37459	3.156e-10	ALMS1
Amplification	chr2	p22.1	39564649	39564708	1	3.4283	9.582e-20
Amplification	chr2	p16.1	55921123	55921182	1	3.14156	9.591e-19
Amplification	chr2	p16.1	60998688	60998747	1	2.52834	2.154e-16	SFT2D3
Amplification	chr2	p13.3	70298339	70298398	1	2.84451	1.13e-17	FAR2P1
Amplification	chr2	p13.1	73749099	73749158	1	2.59078	1.252e-16	PLEKHB2
Amplification	chr2	p11.2	84184014	84184073	1	3.06582	9.799e-19	ARHGAP15
Amplification	chr2	q11.1	95874859	95874918	1	2.49162	2.469e-16	ARHGAP15
Amplification	chr2	q14.3	128460156	128460215	1	2.3032	5.653e-14	NOSTRIN
Amplification	chr2	q21.1	130786789	130786848	1	5.90081	1.566e-21	FASTKD1
Amplification	chr2	q21.1	131905023	131905082	1	3.06746	1.202e-18	SSB
Amplification	chr2	q22.3	144193163	144193222	1	2.90849	3.79e-18	PLCL1
Amplification	chr2	q24.3	169668104	169668161	1	3.05951	1.467e-18	IGFBP5
Amplification	chr2	q31.1	170394686	170394745	1	3.36649	1.132e-19	WDFY1
Amplification	chr2	q31.1	170656682	170656741	1	3.57762	4.503e-20	MLPH
Amplification	chr2	q33.1	198684680	198684739	1	2.0051	1.33e-13	SUMF1
Amplification	chr2	q35	217541333	217541392	1	2.73204	2.476e-17	TMEM43
Amplification	chr2	q36.1	224787064	224787123	1	2.10186	5.69e-14	SCN5A
Amplification	chr2	q37.3	238410887	238410946	1	4.11148	6.711e-21	NCKIPSD
Amplification	chr3	p26.1	4475351	4475410	1	2.44504	1.07e-15	PBRM1
Amplification	chr3	p25.1	14178396	14178450	1	2.58306	1.099e-16
Amplification	chr3	p22.2	38615189	38615248	1	3.77453	2.536e-19	KCTD6
Amplification	chr3	p21.31	48711312	48711371	1	3.78486	1.441e-20
Amplification	chr3	p21.1	52702577	52702636	1	3.04712	1.226e-17
Amplification	chr3	p14.3	55180706	55180765	1	2.66806	8.099e-17
Amplification	chr3	p14.3	58484186	58484245	1	6.23412	2.399e-22	C3orf52
Amplification	chr3	p13	71712411	71712470	1	3.74727	3.316e-14	PPM1L
Amplification	chr3	p12.2	80876315	80876374	1	2.86162	3.698e-16	SERPINI2
Amplification	chr3	p12.2	83049683	83049742	1	2.1239	2.225e-14	SOX2-OT
Amplification	chr3	q13.2	111836959	111837018	1	3.75625	2.651e-15	DGKG
Amplification	chr3	q26.1	167189447	167189506	1	2.36414	9.244e-15	GP5
Amplification	chr3	q26.33	180980691	180980750	1	2.51666	4.987e-16	SOD3
Amplification	chr3	q27.2	185934176	185934235	1	2.79377	1.641e-17
Amplification	chr3	q29	194115999	194116058	1	2.39822	1.618e-15
Amplification	chr4	p15.2	24798376	24798435	1	3.51383	2.988e-18	ARHGAP24
Amplification	chr4	p12	45847432	45847491	1	4.03807	2.808e-20	CCSER1
Amplification	chr4	q21.22	83072226	83072285	1	3.92072	4.595e-21	BMPR1B
Amplification	chr4	q21.23	86790618	86790677	1	2.65906	2.275e-14	FGF2, NUDT6
Amplification	chr4	q22.1	91369713	91369772	1	2.49928	4.637e-13	INTU
Amplification	chr4	q22.3	95841353	95841412	1	2.84274	9.416e-15	USP38
Amplification	chr4	q28.1	128590263	128590322	1	2.26852	8.088e-15	KIAA0922
Amplification	chr4	q31.3	154557686	154557745	1	2.17731	1.706e-14	CTSO
Amplification	chr4	q32.1	156870492	156870551	1	3.06576	1.572e-18	FSTL5, LOC101928052
Amplification	chr4	q32.2	162954756	162954815	1	5.07177	6.217e-22
Amplification	chr4	q34.1	175821046	175821105	1	2.34311	1.29e-15
Amplification	chr4	q35.1	183751175	183751234	1	3.84759	1.314e-20
Amplification	chr5	p15.32	5407990	5408049	1	3.15721	3.198e-18
Amplification	chr5	p15.31	7001059	7001118	1	2.81301	2.022e-17	FBXO4
Amplification	chr5	p13.1	41939686	41939745	1	2.92673	4.766e-18
Amplification	chr5	q13.1	66773057	66773116	1	2.29731	3.739e-15
Amplification	chr5	q13.1	68247463	68247522	1	3.04563	1.571e-18
Amplification	chr5	q14.3	85381873	85381932	1	3.81934	7.865e-20
Amplification	chr5	q14.3	91705071	91705130	1	3.28116	1.477e-19	CDC42SE2
Amplification	chr5	q31.1	130652568	130652627	1	2.30678	6.248e-15
Amplification	chr5	q31.1	135364112	135364165	1	3.47838	1.135e-19	SPRY4
Amplification	chr5	q31.3	141702304	141702363	1	3.269	1.162e-18	UBTD2
Amplification	chr5	q35.1	171671174	171671233	1	2.56071	4.387e-16	RNF130
Amplification	chr5	q35.3	179382581	179382640	1	3.52318	1.206e-19	TMEM170B
Amplification	chr6	p24.2	11558500	11558559	1	2.35557	1.76e-15	RNF182
Amplification	chr6	p23	13978235	13978294	1	2.18983	1.639e-14	ATXN1
Amplification	chr6	p22.3	16697985	16698044	1	3.2568	5.288e-19	FANCE
Amplification	chr6	p21.31	35434789	35434848	1	2.54969	2.347e-14	RNF8
Amplification	chr6	p21.2	37349084	37349136	1	3.16077	8.162e-18
Amplification	chr6	p21.1	43798149	43798208	1	2.33296	4.06e-15
Amplification	chr6	q12	67576409	67576468	1	2.99652	1.325e-17	KCNQ5, KCNQ5-IT1
Amplification	chr6	q13	73371526	73371585	1	3.65424	2.161e-20
Amplification	chr6	q14.1	83151046	83151105	1	5.03689	1.634e-22	LACE1
Amplification	chr6	q21	108645151	108645210	1	3.11807	1.116e-18	CEP57L1
Amplification	chr6	q21	109450490	109450549	1	3.36432	1.033e-18
Amplification	chr6	q22.1	115190112	115190171	1	3.64015	6.761e-14	MCM9
Amplification	chr6	q22.31	119252815	119252874	1	2.72354	2.832e-17	MAP3K5
Amplification	chr6	q23.3	136878348	136878407	1	2.15506	2.305e-14	SHPRH
Amplification	chr6	q24.3	146254386	146254445	1	2.5939	2.084e-16	LATS1
Amplification	chr6	q25.1	150004306	150004365	1	2.14577	1.183e-13
Amplification	chr6	q25.2	153543129	153543188	1	2.24726	3.868e-10
Amplification	chr7	p21.1	19616004	19616063	1	2.53474	2.503e-16
Amplification	chr7	p14.2	36547449	36547508	1	2.49992	8.314e-16	SEPT7P2
Amplification	chr7	p12.3	45789275	45789334	1	2.27201	2.159e-11
Amplification	chr7	p12.3	46392037	46392096	1	3.99917	6.399e-21	ZPBP
Amplification	chr7	p12.2	50070724	50070783	1	2.63897	8.467e-16
Amplification	chr7	q11.22	68694866	68694925	1	5.17016	2.82e-22
Amplification	chr7	q11.23	75810671	75810730	1	2.4349	5.989e-16	CYP51A1
Amplification	chr7	q21.2	91762030	91762089	1	3.74492	1.299e-20	VPS50
Amplification	chr7	q21.3	92940464	92940523	1	3.47058	5.455e-20	COG5, GPR22
Amplification	chr7	q22.3	107114480	107114536	1	3.26974	2.247e-19	LAMB4
Amplification	chr7	q31.1	107757733	107757792	1	2.17457	1.714e-14	ZNF277
Amplification	chr7	q31.1	111851559	111851618	1	2.4694	3.546e-16
Amplification	chr7	q31.2	114899975	114900034	1	3.16288	3.869e-18
Amplification	chr7	q31.33	123911816	123911875	1	2.67785	6.154e-17	ZYX
Amplification	chr7	q34	143086365	143086420	1	3.37033	3.34e-19	CNTNAP2
Amplification	chr7	q35	146088459	146088518	1	2.05208	9.538e-14	LOC102467222
Amplification	chr8	p21.3	20819980	20820039	1	2.76443	1.672e-15	NUGGC
Amplification	chr8	p21.1	27886331	27886390	1	2.63218	1.49e-15	HGSNAT
Amplification	chr8	p11.21	43055678	43055737	1	4.08392	2.124e-19	NKAIN3, UG0898H09
Amplification	chr8	q12.3	63892527	63892586	1	2.38416	2.139e-14	LINC01592
Amplification	chr8	q13.2	69867224	69867283	1	3.49349	3.058e-19	LRRCC1
Amplification	chr8	q21.2	86027709	86027768	1	2.25268	3.171e-14	TMEM67
Amplification	chr8	q22.1	94784795	94784854	1	4.78121	1.108e-21	CPQ
Amplification	chr8	q22.1	97744108	97744167	1	2.44469	3.242e-13	OXR1
Amplification	chr8	q23.1	107630069	107630128	1	2.32559	6.968e-13	EIF3E
Amplification	chr8	q23.1	109248469	109248528	1	2.01552	8.726e-13	PKHD1L1
Amplification	chr8	q23.1	110453483	110453542	1	2.99564	1.423e-17	FER1L6, FER1L6-AS2
Amplification	chr8	q24.13	125058353	125058412	1	2.79371	9.489e-12
Amplification	chr9	p24.3	1999111	1999170	1	4.62726	3.91e-22	CCDC171
Amplification	chr9	p22.3	15920301	15920360	1	3.3911	1.572e-19	MOB3B
Amplification	chr9	p21.2	27415812	27415871	1	3.3933	1.473e-19	LINGO2
Amplification	chr9	p21.1	28849082	28849141	1	3.06916	2.945e-18	LINGO2
Amplification	chr9	p21.1	28932391	28932450	1	2.74489	2.769e-17	LINC01508
Amplification	chr9	q22.2	93120495	93120554	1	2.8067	1.164e-17	ROR2
Amplification	chr9	q22.31	94649669	94649728	1	5.40631	1.184e-22	PTCH1
Amplification	chr9	q22.32	98279162	98279221	1	2.1913	3.476e-10	COL15A1
Amplification	chr9	q22.33	101714691	101714750	1	3.18383	1.047e-18	NR4A3
Amplification	chr9	q31.1	102627513	102627572	1	2.84905	1.474e-17	LINC00474
Amplification	chr9	q33.1	118650708	118650767	1	3.42383	8.153e-20	DENND1A
Amplification	chr9	q33.3	126480075	126480134	1	2.20938	2.91e-14	CCBL1
Amplification	chr9	q34.11	131633235	131633294	1	2.27411	2.465e-14	NOTCH1
Amplification	chr9	q34.3	139397149	139397208	1	3.87087	2.785e-20
Amplification	chr10	p14	9512947	9513006	1	2.42044	8.425e-13	CDNF
Amplification	chr10	p13	14869934	14869993	1	3.97696	4.846e-21	MKX-AS1
Amplification	chr10	p12.1	28035973	28036032	1	2.1079	3.678e-14	PRKG1
Amplification	chr10	q21.1	52921701	52921760	1	2.89107	4.241e-16
Amplification	chr10	q21.1	55040578	55040637	1	2.07419	3.286e-10	ANK3
Amplification	chr10	q21.2	62285863	62285922	1	3.79668	1.156e-20
Amplification	chr10	q22.3	78594374	78594433	1	3.74961	1.452e-20	LOC101929662
Amplification	chr10	q23.1	87192947	87193006	1	2.34527	2.536e-15	IFIT1
Amplification	chr10	q23.31	91161631	91161690	1	2.18603	1.936e-14
Amplification	chr10	q23.33	95490522	95490581	1	2.8103	1.21e-17	HPSE2
Amplification	chr10	q24.2	100242470	100242529	1	2.8436	1.788e-14
Amplification	chr10	q25.1	110139774	110139833	1	2.29863	5.153e-15	BCCIP, DHX32
Amplification	chr10	q26.2	127538354	127538413	1	2.8596	2.974e-17	FAM160A2
Amplification	chr11	p15.4	6254827	6254886	1	4.00595	7.412e-21	TPH1
Amplification	chr11	p15.1	18057497	18057556	1	4.51663	8.672e-22	SERPING1
Amplification	chr11	q12.1	57373913	57373971	1	3.7863	1.192e-20	TMEM132A, SLC15A3
Amplification	chr11	q12.2	60704560	60704615	1	2.8397	1.806e-17	CNTN5
Amplification	chr11	q22.1	99913394	99913453	1	2.43848	1.302e-15	CLMP
Amplification	chr11	q24.1	123045174	123045233	1	2.43079	9.383e-16	CCDC15
Amplification	chr11	q24.2	124873806	124873865	1	3.07618	1.115e-18	OPCML
Amplification	chr11	q25	133244623	133244682	1	4.28828	1.671e-21	CACNA1C
Amplification	chr12	p13.33	2623147	2623206	1	3.70018	1.794e-20
Amplification	chr12	p13.32	3907870	3907929	1	2.7963	3.437e-17	KCNA6
Amplification	chr12	p13.32	4921326	4921385	1	4.60608	5.827e-22	LINC00477
Amplification	chr12	p12.1	24720576	24720635	1	3.54034	8.241e-20	KRAS
Amplification	chr12	p12.1	25398125	25398183	1	3.27057	1.962e-19
Amplification	chr12	q12	38686898	38686957	1	2.7243	1.688e-12	KIF21A
Amplification	chr12	q12	39703409	39703468	1	2.7803	3.143e-17	METTL1
Amplification	chr12	q14.1	58163728	58163784	1	2.085	5.395e-14	SLC16A7
Amplification	chr12	q14.1	60098728	60098787	1	4.24729	1.539e-21	RASSF3
Amplification	chr12	q14.2	65078601	65078660	1	2.50187	2.788e-16	PPP1R12A
Amplification	chr12	q21.2	80168419	80168478	1	2.79011	9.913e-18
Amplification	chr12	q22	92904583	92904642	1	2.91857	1.018e-16	NR2C1
Amplification	chr12	q22	95416079	95416138	1	2.0711	3.352e-13	ACTR6, DEPDC4
Amplification	chr12	q23.1	100606218	100606277	1	3.68575	2.79e-20
Amplification	chr12	q23.2	103485872	103485931	1	2.74727	1.484e-14	TXNRD1
Amplification	chr12	q23.3	104743260	104743319	1	2.43566	6.112e-16	SART3
Amplification	chr12	q23.3	108931234	108931293	1	4.07026	1.05e-20	GLTP
Amplification	chr12	q24.11	110315715	110315774	1	2.23524	3.657e-12	CCDC62
Amplification	chr12	q24.31	123311584	123311643	1	3.89344	6.475e-20	SFSWAP
Amplification	chr12	q24.33	132284122	132284181	1	2.47319	6.4e-16	SLC25A30
Amplification	chr13	q14.13	45969449	45969508	1	3.75711	6.518e-20	DLEU7
Amplification	chr13	q14.3	51302816	51302875	1	3.51842	5.637e-20	PCDH17
Amplification	chr13	q21.1	58262104	58262163	1	2.98211	3.948e-18
Amplification	chr13	q21.31	65418400	65418459	1	4.38267	1.401e-21	LINC00333
Amplification	chr13	q31.1	85103640	85103699	1	2.50062	5.763e-14	GPC6
Amplification	chr13	q31.3	93989507	93989566	1	3.06833	7.288e-18	LOC101927437
Amplification	chr13	q32.3	100566538	100566597	1	2.05094	1.158e-12
Amplification	chr13	q32.3	101358431	101358490	1	2.07138	2.04e-13	MYO16
Amplification	chr13	q33.3	109760818	109760877	1	3.78886	1.372e-20	CARS2
Amplification	chr13	q34	111296709	111296768	1	2.34295	2.562e-15	MDGA2
Amplification	chr14	q21.3	47687306	47687365	1	2.10152	4.461e-14	L2HGDH
Amplification	chr14	q21.3	50732173	50732232	1	2.08671	5.686e-14	TRIM9
Amplification	chr14	q22.1	51540543	51540602	1	2.53634	7.258e-11	MIR548AZ, ESR2
Amplification	chr14	q23.2	64744397	64744456	1	2.44193	4.108e-16	MPP5
Amplification	chr14	q23.3	67748016	67748075	1	3.45443	1.764e-19
Amplification	chr14	q24.2	73362550	73362609	1	2.1106	3.694e-14	DNAL1
Amplification	chr14	q24.3	74122475	74122534	1	2.20089	5.981e-13	TSHR
Amplification	chr14	q31.1	81425243	81425302	1	4.35633	1.098e-20	ZNF839
Amplification	chr14	q32.31	102805003	102805062	1	2.02797	6.503e-10	CDC42BPB
Amplification	chr14	q32.32	103447204	103447263	1	3.13755	5.612e-19
Amplification	chr14	q32.33	104913869	104913928	1	2.17398	3.595e-11	ATP10A
Amplification	chr15	q12	25923865	25923924	1	2.43516	1.416e-15	GABRG3
Amplification	chr15	q12	27445296	27445355	1	2.31481	1.008e-14	MGA
Amplification	chr15	q15.1	41989960	41990019	1	2.30407	7.58e-15	ZNF106
Amplification	chr15	q15.1	42758647	42758706	1	2.6551	3.776e-17	HAUS2
Amplification	chr15	q15.2	42844964	42845023	1	3.13766	2.534e-18	TTBK2
Amplification	chr15	q15.2	43087385	43087444	1	2.04575	1.168e-13	CCNB2
Amplification	chr15	q22.2	59412237	59412296	1	2.42067	5.577e-16	PIAS1
Amplification	chr15	q24.3	77516282	77516341	1	2.83675	7.227e-18	PEAK1, LINC00597
Amplification	chr15	q26.1	90167464	90167523	1	3.3095	3.261e-19	TICRR
Amplification	chr15	q26.1	91045753	91045812	1	2.99337	2.284e-18
Amplification	chr15	q26.2	97722156	97722215	1	2.23923	2.67e-14
Amplification	chr16	p13.3	4529314	4529373	1	2.92566	5.669e-18	HMOX2
Amplification	chr16	p13.3	6388648	6388707	1	2.63489	4.051e-14	RBFOX1
Amplification	chr16	p12.1	27340054	27340113	1	2.24328	4.805e-14	IL4R
Amplification	chr16	q11.2	46615097	46615156	1	2.07268	7.086e-12	SHCBP1
Amplification	chr16	q21	61935254	61935313	1	4.33598	7.035e-21	CDH8
Amplification	chr16	q21	66491377	66491436	1	2.3226	2.721e-15	BEAN1
Amplification	chr16	q22.1	68059342	68059401	1	2.42013	7.51e-15	DUS2
Amplification	chr16	q22.1	69602373	69602432	1	2.82894	1.495e-14	NFAT5
Amplification	chr16	q24.3	88925252	88925311	1	3.27981	5.098e-19	TRAPPC2L
Amplification	chr17	p13.3	526813	526872	1	4.63631	4.688e-22	VPS53
Amplification	chr17	p13.2	3379400	3379459	1	3.45843	9.581e-13	ASPA
Amplification	chr17	p13.2	3469848	3469907	1	2.10115	6.174e-14	TRPV1
Amplification	chr17	p11.2	18882975	18883026	1	2.89369	7.946e-18	SLC5A10, FAM83G
Amplification	chr17	q12	34266390	34266438	1	3.05915	1.217e-18	LYZL6
Amplification	chr17	q22	54913733	54913792	1	2.13892	2.988e-14	DGKE
Amplification	chr17	q25.1	73116559	73116618	1	2.27008	9.75e-15	ARMC7
Amplification	chr18	p11.31	3458329	3458388	1	2.15622	1.219e-12	TGIF1
Amplification	chr18	p11.22	8536769	8536828	1	2.54388	4.863e-10
Amplification	chr18	q11.2	19691383	19691442	1	2.76191	1.528e-16
Amplification	chr18	q12.1	25727668	25727724	1	3.29602	2.444e-19	CDH2
Amplification	chr18	q21.2	53209835	53209894	1	2.42742	6.442e-16	TCF4
Amplification	chr18	q21.31	56063722	56063780	1	2.33396	1.278e-13	NEDD4L
Amplification	chr18	q21.33	60004574	60004633	1	3.38073	8.14e-20	TNFRSF11A
Amplification	chr18	q23	76903814	76903873	1	2.99522	2.55e-18	ATP9B
Amplification	chr18	q23	77185869	77185928	1	2.10422	2.263e-11	NFATC1
Amplification	chr19	p13.3	6167534	6167593	1	2.98103	3.16e-18	ACSBG2
Amplification	chr19	p13.2	8457157	8457209	1	2.08763	1.033e-13	RAB11B
Amplification	chr19	p13.2	11274962	11275021	1	6.93756	3.621e-23	KANK2
Amplification	chr19	p13.2	12941086	12941137	1	2.52313	4.392e-16	RTBDN
Amplification	chr19	p13.11	17173780	17173839	1	2.22851	1.161e-14	HAUS8
Amplification	chr19	q12	29281486	29281545	1	2.64177	9.559e-17
Amplification	chr19	q13.31	44535229	44535288	1	3.91129	7.282e-21	ZNF222
Amplification	chr19	q13.33	49415642	49415701	1	3.85586	1.18e-20	NUCB1, NUCB1-AS1
Amplification	chr19	q13.41	51742661	51742720	1	2.53747	1.594e-16	CD33
Amplification	chr20	p12.1	14700040	14700099	1	4.37586	1.249e-21	MACROD2
Amplification	chr20	p12.1	17848016	17848075	1	2.50699	3.428e-16
Amplification	chr20	q12	39924793	39924852	1	3.21177	2.899e-19	ZHX3
Amplification	chr20	q13.12	45276546	45276605	1	2.37229	1.822e-15	SLC13A3
Amplification	chr20	q13.33	61574503	61574556	1	2.66398	1.118e-16	GID8
Amplification	chr21	q21.1	16413202	16413261	1	3.04982	1.205e-18	NRIP1
Amplification	chr21	q21.2	24898178	24898237	1	5.5344	8.434e-23
Amplification	chr21	q22.12	36774743	36774802	1	2.63323	2.983e-10	LOC100506403
Amplification	chr21	q22.3	43275477	43275536	1	2.91047	9.363e-17	PRDM15
Amplification	chr22	q13.33	50654303	50654361	1	4.98692	4.998e-21	SELO
Amplification	chrX	p22.33	2937367	2937426	1	2.37756	1.457e-15	ARSH
Amplification	chrX	p22.33	3376643	3376702	1	3.57692	8.526e-20
Amplification	chrX	p22.31	7584633	7584692	1	2.01298	1.883e-13
Amplification	chrX	p21.1	32834690	32834749	1	3.32865	1.486e-19	DMD
Amplification	chrX	p11.4	37913470	37913525	1	2.87972	9.93e-18	SYTL5
Amplification	chrX	p11.23	46407630	46407689	1	4.69976	1.205e-21	ZNF674-AS1
Amplification	chrX	p11.21	56098940	56098999	1	2.05992	1.81e-13
Amplification	chrX	q13.1	70317930	70317989	1	2.05685	1.903e-10	FOXO4
Amplification	chrX	q21.1	84017187	84017246	1	2.16653	1.308e-12
Amplification	chrX	q22.1	101109001	101109060	1	3.59176	5.33e-12	NXF5
Amplification	chrX	q22.3	105277223	105277282	1	3.34947	1.062e-19	SERPINA7
Amplification	chrX	q23	108939388	108939447	1	2.89102	4.499e-11	ACSL4
Amplification	chrX	q24	118715445	118715504	1	6.13429	1.404e-22	UBE2A
Amplification	chrX	q25	124472419	124472478	1	2.82713	1.328e-17
Amplification	chrX	q25	126861350	126861409	1	3.08292	8.153e-19
Amplification	chrX	q26.3	137041064	137041123	1	3.49821	1.199e-19
Amplification	chrX	q28	150179948	150180007	1	5.40741	6.274e-23
Amplification	chrX	q28	153059079	153059138	1	2.02739	4.819e-13	IDH3G
Amplification	chrY	p11.2	7057476	7057535	1	6.74631	2.434e-18
Amplification	chrY	p11.2	8028838	8028897	1	5.6735	8.191e-16
Amplification	chrY	q11.221	15206937	15206996	1	4.60037	1.142e-12
Amplification	chrY	q11.223	23354523	23354582	1	5.15488	1.025e-17
Deletion	chr12	p13.31	9637323	9713425	2	-1.69595	2.205e-13
Deletion	chr5	p14.2	24178293	24178352	1	-2.67436	1.2e-10	C5orf17
Gain	chr1	p36.22	10531673	10531732	1	1.72407	1.957e-11	DFFA
Gain	chr1	p34.3	36736576	36736635	1	1.76798	1.348e-11	THRAP3
Gain	chr1	q21.3	150634307	150634359	1	1.65309	1.189e-10	GOLPH3L
Gain	chr1	q25.3	182429117	182429176	1	1.67604	6.688e-11	RGSL1
Gain	chr1	q31.2	193151832	193151891	1	1.9766	2.826e-13	CDC73, B3GALT2
Gain	chr1	q32.2	211469010	211469068	1	1.71724	9.043e-11	RCOR3
Gain	chr1	q41	219134907	219134966	1	1.77647	4.933e-12	MIR548F3
Gain	chr1	q43	240599205	240599264	1	1.95916	8.093e-13	FMN2
Gain	chr1	q43	242987737	242987796	1	1.60289	4.078e-10
Gain	chr2	p25.3	3501952	3584798	2	1.47938	7.853e-14	ADI1
Gain	chr2	p23.3	27602409	27602468	1	1.89226	1.001e-12	ZNF513
Gain	chr2	p22.1	38876515	38876574	1	1.75577	8.545e-12
Gain	chr2	p16.2	54393536	54453269	2	1.88065	1.114e-21	ACYP2
Gain	chr2	p13.1	74404652	74404711	1	1.63854	1.706e-10	MOB1A
Gain	chr2	p12	83042084	83042143	1	1.67129	7.539e-11
Gain	chr2	q14.2	120684209	120684268	1	1.60041	6.493e-10	PTPN4
Gain	chr2	q14.3	122662279	122662338	1	1.72037	4.09e-11
Gain	chr2	q24.3	167182965	167183024	1	1.6361	1.812e-10	SCN9A
Gain	chr2	q35	218809548	218809607	1	1.57953	7.146e-10
Gain	chr2	q35	219666757	219666816	1	1.87214	1.13e-12	CYP27A1
Gain	chr2	q37.3	241909587	241909646	1	1.9193	1.042e-12
Gain	chr3	p14.2	59802366	59802425	1	1.96734	5.515e-13	FHIT
Gain	chr3	p14.1	69151170	69151229	1	1.59296	5.181e-10	ARL6IP5
Gain	chr3	p12.2	80162639	80162698	1	1.75405	4.154e-10
Gain	chr3	p11.1	88645115	88645174	1	1.97246	1.411e-12
Gain	chr3	q21.3	127357611	127357670	1	1.86914	2.149e-10	PODXL2
Gain	chr4	p15.33	13369890	13369949	1	1.8185	2.534e-12	RAB28
Gain	chr4	q22.1	93662655	93662714	1	1.63024	2.093e-10	GRID2
Gain	chr4	q31.21	146054783	146054842	1	1.72755	1.788e-11	OTUD4
Gain	chr4	q31.22	146865223	146865282	1	1.91658	6.688e-13
Gain	chr5	q33.1	150050296	150050343	1	1.71696	2.353e-11	MYOZ3
Gain	chr5	q33.1	150459491	150459548	1	1.79377	4.677e-12	TNIP1
Gain	chr6	p22.3	24777043	24777102	1	1.77939	5.221e-12	GMNN
Gain	chr6	q27	166203071	166203130	1	1.8572	1.886e-10
Gain	chr7	p21.3	12865695	12865754	1	1.89867	5.315e-12
Gain	chr7	p15.2	26765068	26765127	1	1.79784	2.847e-12	SKAP2
Gain	chr7	p11.2	54676476	54676535	1	1.82775	3.83e-12
Gain	chr7	q11.21	64399921	64399980	1	1.91644	8.286e-12
Gain	chr7	q21.12	86740214	86740273	1	1.71217	3.012e-11
Gain	chr7	q22.1	103575236	103575295	1	1.96296	2.575e-13	RELN
Gain	chr7	q31.31	118866671	118866730	1	1.68632	3.371e-10
Gain	chr7	q33	133314857	133314916	1	1.67013	7.763e-11	EXOC4
Gain	chr7	q35	145279940	145349314	2	1.9408	1.625e-20
Gain	chr8	p22	14062620	14104611	2	1.76397	1.1e-15	SGCZ
Gain	chr8	p22	18559625	18559684	1	1.94693	2.415e-11	PSD3
Gain	chr8	p21.2	23947786	24036716	2	1.85426	2.58e-18
Gain	chr8	q21.11	75661636	75661695	1	1.72835	1.223e-10	MIR2052HG
Gain	chr9	p23	9627338	9627397	1	1.92533	5.317e-13	PTPRD
Gain	chr9	p23	10164896	10164955	1	1.75334	9.109e-12	PTPRD
Gain	chr9	p23	12275118	12275177	1	1.58486	6.292e-10
Gain	chr9	p13.3	33248412	33248467	1	1.91008	2.85e-12	SPINK4
Gain	chr9	p13.3	34418303	34418362	1	1.7839	4.961e-12	FAM219A
Gain	chr9	q21.13	75276569	75276628	1	1.9847	5.537e-13	TMC1
Gain	chr9	q22.33	102112198	102227981	2	1.65597	2.032e-19	NAMA
Gain	chr9	q33.3	129571350	129571409	1	1.69084	1.455e-10	ZBTB43
Gain	chr10	p13	13336545	13336604	1	1.72738	1.008e-10	PHYH
Gain	chr10	p13	14694155	14694214	1	1.81611	3.195e-12	FAM107B
Gain	chr10	p11.22	32689808	32689867	1	1.5755	7.866e-10
Gain	chr10	q11.22	48431597	48431651	1	1.86583	2.495e-12	GDF10
Gain	chr10	q21.2	62918221	62918280	1	1.88819	2.647e-11
Gain	chr10	q21.2	63822305	63822364	1	1.97929	6.383e-11	ARID5B
Gain	chr10	q24.32	103557387	103557446	1	1.65909	3.357e-10	MGEA5
Gain	chr10	q26.3	130977858	130977917	1	1.89034	1.618e-12
Gain	chr11	p15.3	11368811	11368870	1	1.70532	7.844e-11	GALNT18
Gain	chr11	p15.1	18285032	18327904	3	1.09842	1.958e-12	SAA1, HPS5
Gain	chr11	p14.1	30985401	30985460	1	1.95888	3.717e-13	DCDC5
Gain	chr11	p11.2	47602128	47602181	1	1.96497	4.313e-13	NDUFS3
Gain	chr11	q14.1	84367238	84477088	3	1.38054	2.466e-17	DLG2
Gain	chr11	q23.1	111916577	111916636	1	1.86125	7.205e-11	DLAT
Gain	chr12	p13.33	2112342	2112401	1	1.99646	1.609e-13	DCP1B
Gain	chr12	q12	41784743	41784802	1	1.6352	1.852e-10	PDZRN4
Gain	chr12	q14.2	64868025	64868084	1	1.6889	4.829e-11	TBK1
Gain	chr12	q23.1	96275255	96275314	1	1.70669	3.143e-11	CCDC38
Gain	chr12	q24.31	124896719	124896778	1	1.6361	1.812e-10	NCOR2
Gain	chr13	q14.11	40773015	40773071	1	1.78319	4.827e-12	LINC00548
Gain	chr13	q14.3	52277739	52277798	1	1.8106	1.974e-10	WDFY2
Gain	chr13	q22.1	73327891	73327950	1	1.9067	6.873e-13	BORA
Gain	chr13	q32.1	95450110	95450169	1	1.87605	1.227e-12	LOC101927284
Gain	chr14	q12	29258559	29258618	1	1.75215	1.16e-11	LINC01551
Gain	chr14	q13.3	37671457	37671516	1	1.79084	4.057e-12	MIPOL1
Gain	chr14	q31.3	88872280	89037022	6	1.40105	1.088e-23	SPATA7, PTPN21, ZC3H14
Gain	chr15	q11.2	25682628	25682687	1	1.69009	9.657e-11	UBE3A
Gain	chr15	q22.31	65384171	65384230	1	1.9992	1.767e-13
Gain	chr15	q22.31	65735832	65808070	3	1.24249	9.879e-12	DPP8
Gain	chr15	q25.2	85198421	85198471	1	1.79032	4.436e-12	NMB
Gain	chr16	p13.3	4361374	4361433	1	1.80001	7.128e-12
Gain	chr16	q12.1	50784077	50784136	1	1.97173	2.415e-13	CYLD
Gain	chr16	q22.1	69199941	69200000	1	1.84754	3.233e-11	UTP4
Gain	chr17	q22	57217377	57217436	1	1.9567	2.607e-12	SKA2
Gain	chr17	q22	57291664	57291723	1	1.71599	1.413e-10	SMG8
Gain	chr19	p13.12	14218183	14218238	1	1.80672	4.519e-12	PRKACA
Gain	chr19	q13.11	33145106	33145165	1	1.81766	3.452e-12	ANKRD27
Gain	chr19	q13.12	38095036	38123771	2	1.62694	3.619e-16	ZNF540, ZFP30
Gain	chr20	q11.23	37045370	37045429	1	1.89215	7.357e-11
Gain	chr20	q13.2	50665134	50665193	1	1.88483	1.052e-12
Gain	chr20	q13.2	51188103	51188162	1	1.69272	8.681e-11
Gain	chr20	q13.32	56992358	56992417	1	1.99487	1.737e-13	VAPB
Gain	chr20	q13.33	62893130	62893189	1	1.62831	2.194e-10	PCMTD2
Gain	chr21	q21.1	17639720	17697614	2	1.93898	6.886e-24	MIR99AHG
Gain	chr21	q22.3	45226499	45226553	1	1.91098	6.552e-13	AATBC
Gain	chr22	q12.3	35797255	35805966	2	1.61638	9.29e-14	MCM5
Gain	chr22	q13.2	43709818	43709877	1	1.57665	7.653e-10	SCUBE1
Gain	chrX	p22.31	6182689	6182748	1	1.79817	7.095e-12
Gain	chrX	p22.2	9595604	9595663	1	1.75165	9.524e-12	TBL1X
Gain	chrX	p22.12	20274754	20379007	2	1.49044	1.333e-15	RPS6KA3
Gain	chrX	q23	109654845	109654904	1	1.72667	1.83e-11	AMMECR1
Gain	chrX	q23	111700930	111700989	1	1.6377	1.741e-10
Gain	chrX	q26.2	130571153	130571212	1	1.69764	3.865e-11
Gain	chrY	p11.31 - p11.2	2656461	9072145	50	0.796858	2.242e-31	RPS4Y1, ZFY, LINC00278, TGIF2LY, PCDH11Y, TTTY23B, TTTY23, TSPY2, LINC00280, TTTY1, TTTY1B, TTTY2, TTTY2B, TTTY21, TTTY21B, TTTY7B, TTTY7, TTTY8B, TTTY8, AMELY, TBL1Y, PRKY, TTTY16, TTTY12, TTTY18, TTTY19, TTTY11
Gain	chrY	q11.21 - q11.23	14083244	28767604	127	0.379825	3.791e-33	GYG2P1, TTTY15, USP9Y, DDX3Y, UTY, TMSB4Y, VCY, VCY1B, NLGN4Y, NLGN4Y-AS1, FAM41AY1, FAM41AY2, FAM224B, FAM224A, XKRY2, XKRY, CDY2B, CDY2A, HSFY2, HSFY1, TTTY9B, TTTY9A, TTTY14, CD24, BCORP1, TXLNGY, KDM5D, TTTY10, EIF1AY, RPS4Y2, PRORY, RBMY2EP, RBMY1B, RBMY1A1, RBMY1E, RBMY1D, TTTY13, PRY2, PRY, LOC101929148, TTTY6, TTTY6B, RBMY1J, RBMY1F, TTTY5, RBMY2FP, LOC100652931, TTTY17B, TTTY17A, TTTY17C…

## Sheet: 3_F
Type	Chr	Cytoband	Start	Stop	#Probes	Amplification/Deletion	P_Value	Gene Names
Amplification	chr1	q41	219134907	219134966	1	2.77181	4.779e-15	MIR548F3
Amplification	chr4	p15.1	29188623	29188682	1	2.3262	4.064e-11
Amplification	chr4	q13.1	66356902	66356961	1	2.39499	1.11e-11	EPHA5
Amplification	chr5	q13.2	73158692	73158751	1	3.02605	3.305e-14	ARHGEF28
Amplification	chr5	q14.3	90752354	90752413	1	2.41504	7.554e-12
Amplification	chr5	q33.3	155801164	155801223	1	2.86371	6.118e-16	SGCD
Amplification	chr6	q14.3	86924976	86925035	1	2.39718	1.065e-11
Amplification	chr6	q21	114573805	114573864	1	2.72284	1.391e-14	LOC101927768
Amplification	chr7	p12.3	45789275	45789334	1	2.80586	2.248e-15	SEPT7P2
Amplification	chr7	p11.2	54676476	54676535	1	2.80308	2.392e-15
Amplification	chr8	q21.11	75661636	75661695	1	2.56719	3.679e-13	MIR2052HG
Amplification	chr9	p23	10164896	10164955	1	2.45298	3.615e-12	PTPRD
Amplification	chr9	q34.11	131633235	131633294	1	3.12845	1.865e-18	CCBL1
Amplification	chr10	p13	14694155	14694214	1	2.86356	6.14e-16	FAM107B
Amplification	chr11	p15.4	9200052	9200111	1	2.35063	2.574e-11	DENND5A
Amplification	chr11	q24.3	128350397	128350456	1	2.21259	3.202e-10	ETS1
Amplification	chr12	p13.31	6980081	6980140	1	3.02303	3.173e-15	TPI1, SPSB2
Amplification	chr12	p12.1	24074321	24074380	1	2.21802	2.908e-10	SOX5
Amplification	chr15	q15.1	42758647	42758706	1	3.00638	2.213e-17	ZNF106
Amplification	chr15	q22.31	65735832	65735891	1	2.34833	2.687e-11
Amplification	chr16	p13.3	6836910	6836969	1	2.20145	3.899e-10	RBFOX1
Amplification	chrX	q21.1	84017187	84017246	1	2.51352	1.09e-12
Deletion	chr1	p13.2	112531449	112531505	1	-3.12078	1.379e-18	KCND3
Gain	chr8	q21.2	86168269	86245789	2	1.55404	4.163e-10	CA13, CA1
Gain	chrY	p11.31 - p11.2	2656461	9148336	43	1.16839	2.621e-46	RPS4Y1, ZFY, LINC00278, TGIF2LY, PCDH11Y, TTTY23B, TTTY23, TSPY2, LINC00280, TTTY1, TTTY1B, TTTY2, TTTY2B, TTTY21, TTTY21B, TTTY7B, TTTY7, TTTY8B, TTTY8, AMELY, TBL1Y, PRKY, TTTY16, TTTY12, TTTY18, TTTY19, TTTY11
Gain	chrY	q11.21 - q11.23	14083244	28548485	119	0.673654	8.56e-60	GYG2P1, TTTY15, USP9Y, DDX3Y, UTY, TMSB4Y, VCY, VCY1B, NLGN4Y, NLGN4Y-AS1, FAM41AY1, FAM41AY2, FAM224B, FAM224A, XKRY2, XKRY, CDY2B, CDY2A, HSFY2, HSFY1, TTTY9B, TTTY9A, TTTY14, CD24, BCORP1, TXLNGY, KDM5D, TTTY10, EIF1AY, RPS4Y2, PRORY, RBMY2EP, RBMY1B, RBMY1A1, RBMY1E, RBMY1D, TTTY13, PRY2, PRY, LOC101929148, TTTY6, TTTY6B, RBMY1J, RBMY1F, TTTY5, RBMY2FP, LOC100652931, TTTY17B, TTTY17A, TTTY17C…
Loss	chr21	p11.2 - p11.1	9832936	11053902	21	-0.602079	1.603e-14	TEKT4P2, TPTE, BAGE4, BAGE5, BAGE2, BAGE3

## Sheet: 7_F
Type	Chr	Cytoband	Start	Stop	#Probes	Amplification/Deletion	P_Value	Gene Names
Amplification	chr6	p21.31	36410520	36410579	1	2.02879	2.644e-11	PXT1, KCTD20
Deletion	chr3	p26.3	212711	633508	8	-1.01244	1.187e-18	CHL1, CHL1-AS1
Gain	chrY	p11.31 - p11.2	2656461	9901314	50	0.919873	9.674e-39	RPS4Y1, ZFY, LINC00278, TGIF2LY, PCDH11Y, TTTY23B, TTTY23, TSPY2, LINC00280, TTTY1, TTTY1B, TTTY2, TTTY2B, TTTY21, TTTY21B, TTTY7B, TTTY7, TTTY8B, TTTY8, AMELY, TBL1Y, PRKY, TTTY16, TTTY12, TTTY18, TTTY19, TTTY11, RBMY1A3P, TTTY20, FAM197Y2P, FAM197Y5P, TSPY4, TSPY8, TSPY3, TSPY10, TSPY1, RBMY3AP, TTTY22
Gain	chrY	q11.21 - q11.23	14061053	28767604	124	0.552511	8.299e-53	GYG2P1, TTTY15, USP9Y, DDX3Y, UTY, TMSB4Y, VCY, VCY1B, NLGN4Y, NLGN4Y-AS1, FAM41AY1, FAM41AY2, FAM224B, FAM224A, XKRY2, XKRY, CDY2B, CDY2A, HSFY2, HSFY1, TTTY9B, TTTY9A, TTTY14, CD24, BCORP1, TXLNGY, KDM5D, TTTY10, EIF1AY, RPS4Y2, PRORY, RBMY2EP, RBMY1B, RBMY1A1, RBMY1E, RBMY1D, TTTY13, PRY2, PRY, LOC101929148, TTTY6, TTTY6B, RBMY1J, RBMY1F, TTTY5, RBMY2FP, LOC100652931, TTTY17B, TTTY17A, TTTY17C…

## Sheet: 12_F
Type	Chr	Cytoband	Start	Stop	#Probes	Amplification/Deletion	P_Value	Gene Names
Amplification	chr2	q13	112102800	112102859	1	2.21925	5.568e-10
Amplification	chr6	p21.31	36410520	36410579	1	2.01361	9.362e-13	PXT1, KCTD20
Amplification	chr7	p15.2	26853382	26853441	1	2.30296	2.82e-13	SKAP2
Amplification	chr14	q13.3	37401127	37401186	1	2.22872	3.47e-12	SLC25A21
Deletion	chr1	p36.13	18957565	18957624	1	-1.98279	4e-13	PAX7
Deletion	chr1	p34.3	39334614	39334673	1	-1.50882	2.021e-10	MYCBP, GJA9-MYCBP
Deletion	chr1	q41	222694279	222694338	1	-2.85524	8.04e-16
Deletion	chr1	q42.3	235639349	235639408	1	-2.07861	1.244e-13	B3GALNT2
Deletion	chr2	p24.3	14773079	14773127	1	-2.64433	1.277e-16	FAM84A
Deletion	chr2	p23.3	24281624	24281683	1	-2.35279	2.888e-14	FKBP1B
Deletion	chr2	q24.1	155796265	155796324	1	-1.76697	1.373e-10
Deletion	chr2	q36.3	228243887	228243941	1	-2.73286	1.273e-16	TM4SF20
Deletion	chr3	p25.1	13459301	13459360	1	-2.1586	1.506e-13	NUP210
Deletion	chr4	p15.2	25661606	25661665	1	-2.4578	3.745e-10	SLC34A2
Deletion	chr4	p12	45106338	45106397	1	-1.67049	9.417e-11
Deletion	chr7	p12.3	48531561	48531620	1	-2.01183	7.054e-10	ABCA13
Deletion	chr8	p11.22	39258894	39386158	4	-2.80915	8.779e-35	ADAM5, ADAM3A
Deletion	chr8	q24.13	124857091	124857150	1	-2.64257	3.09e-16
Deletion	chr8	q24.22	133234512	133234571	1	-2.52069	8.743e-14	KCNQ3
Deletion	chr9	p23	9972017	9972076	1	-2.14233	2.546e-13	PTPRD
Deletion	chr9	p23	13959104	13959163	1	-2.07219	1.281e-13
Deletion	chr10	q22.2	76694484	76694543	1	-2.04212	1.366e-12	KAT6B, LOC101929165
Deletion	chr10	q25.1	111037990	111038049	1	-1.82105	4.081e-12
Deletion	chr11	q14.1	84860573	84860632	1	-1.54767	6.49e-10	DLG2
Deletion	chr12	p13.31	9637323	9713425	2	-1.45156	6.185e-12
Deletion	chr12	p12.1	23386854	23386913	1	-1.95481	1.614e-12
Deletion	chr12	p11.22	28660102	28660161	1	-1.85838	5.31e-12	CCDC91
Deletion	chr12	q21.2	76738299	76738358	1	-3.1678	4.884e-17	BBS10
Deletion	chr15	q15.1	40329930	40329989	1	-1.87271	6.145e-12	SRP14
Deletion	chr15	q21.1	45009724	45009783	1	-1.78139	3.106e-11	B2M
Deletion	chr16	p13.3	3565534	3565593	1	-1.61115	1.74e-10	CLUAP1
Deletion	chr16	q22.1	69703926	69703984	1	-1.62474	1.973e-10	NFAT5
Deletion	chr17	p11.2	21445667	21445726	1	-1.696	2.438e-10	C17orf51
Deletion	chr20	q11.23	37213881	37289296	2	-1.09538	1.356e-10	ADIG, ARHGAP40
Deletion	chr20	q13.2	50759856	50759915	1	-3.01297	1.8e-14	ZFP64
Deletion	chr20	q13.33	58517504	58517562	1	-1.6259	6.874e-11	FAM217B
Gain	chr2	q22.2	142843780	142843839	1	1.49659	8.047e-10	LRP1B
Gain	chr4	q28.1	124093576	124093635	1	1.74695	1.032e-10	SPATA5
Gain	chr5	q21.1	99605923	99605982	1	1.94258	6.221e-10
Gain	chr7	p15.3	24038750	24038809	1	1.76509	8.027e-10
Gain	chr8	q24.13	126036830	126036889	1	1.69297	1.31e-10	KIAA0196
Gain	chr9	p22.3	15745493	15745552	1	1.6379	1.481e-10	CCDC171
Gain	chr10	p13	14694155	14694214	1	1.97511	3.841e-13	FAM107B
Gain	chr11	p14.1	27901225	28154170	7	0.813438	5.228e-13	KIF18A, MIR610, METTL15
Gain	chr13	q12.13	25669912	25743121	2	1.13052	1.134e-10	PABPC3, AMER2
Gain	chr15	q11.1 - q11.2	20575646	22378143	6	0.837195	5.774e-16	HERC2P3, GOLGA6L6, GOLGA8CP, NBEAP1, MIR3118-4, MIR3118-3, MIR3118-2, POTEB3, POTEB, POTEB2, NF1P2, MIR5701-3, MIR5701-1, MIR5701-2, LINC01193, LOC646214, CXADRP2, LOC101927079, LOC727924, OR4M2
Gain	chr15	q25.1	81631068	81631127	1	1.57515	5.897e-10	TMC3-AS1, TMC3
Gain	chr21	q21.3	29085595	29085654	1	1.76694	4.962e-11	MIR5009
Gain	chrX	q11.2	64140092	64140151	1	1.99141	4.239e-10	ZC4H2
Gain	chrX	q21.1	79975010	79975069	1	1.96378	1.284e-10	BRWD3
Gain	chrY	p11.31 - p11.2	2656461	9901314	49	0.504807	7.612e-18	RPS4Y1, ZFY, LINC00278, TGIF2LY, PCDH11Y, TTTY23B, TTTY23, TSPY2, LINC00280, TTTY1, TTTY1B, TTTY2, TTTY2B, TTTY21, TTTY21B, TTTY7B, TTTY7, TTTY8B, TTTY8, AMELY, TBL1Y, PRKY, TTTY16, TTTY12, TTTY18, TTTY19, TTTY11, RBMY1A3P, TTTY20, FAM197Y2P, FAM197Y5P, TSPY4, TSPY8, TSPY3, TSPY10, TSPY1, RBMY3AP, TTTY22
Loss	chr5	p15.2	10733936	10786692	3	-0.990507	1.704e-10	DAP
Loss	chr9	q21.11 - q21.33	71151735	89346554	304	-0.473364	6.312e-213	TMEM252, LINC01506, PIP5K1B, FAM122A, LOC101927069, PRKACG, FXN, TJP2, BANCR, FAM189A2, APBA1, PTAR1, C9orf135-AS1, C9orf135, MAMDC2, MAMDC2-AS1, SMC5-AS1, SMC5, KLF9, TRPM3, MIR204, TMEM2, ABHD17B, C9orf85, C9orf57, GDA, LINC01504, ZFAND5, TMC1, LINC01474, ALDH1A1, ANXA1, MIR6130, LOC101927358, RORB-AS1, RORB, TRPM6, C9orf40, C9orf41-AS1, CARNMT1, NMRK1, OSTF1, MIR548H3, PCSK5, RFK, RPSAP9, GCNT…

## Sheet: 13_F
Type	Chr	Cytoband	Start	Stop	#Probes	Amplification/Deletion	P_Value	Gene Names
Deletion	chr6	p21.1	41243719	41243778	1	-4.85025	3.636e-22	TREM1
Deletion	chrX	q11.2	64483521	64483580	1	-1.85749	3.661e-12
Gain	chr7	p11.2	54676476	54758142	2	1.41007	2.342e-11
Gain	chr15	q15.1	42758647	42758706	1	1.6837	6.2e-11	ZNF106
Gain	chrY	p11.31 - p11.2	2656461	9072145	45	0.571576	1.402e-18	RPS4Y1, ZFY, LINC00278, TGIF2LY, PCDH11Y, TTTY23B, TTTY23, TSPY2, LINC00280, TTTY1, TTTY1B, TTTY2, TTTY2B, TTTY21, TTTY21B, TTTY7B, TTTY7, TTTY8B, TTTY8, AMELY, TBL1Y, PRKY, TTTY16, TTTY12, TTTY18, TTTY19, TTTY11
Gain	chrY	q11.21 - q11.23	14061053	28767604	129	0.32615	1.025e-28	GYG2P1, TTTY15, USP9Y, DDX3Y, UTY, TMSB4Y, VCY, VCY1B, NLGN4Y, NLGN4Y-AS1, FAM41AY1, FAM41AY2, FAM224B, FAM224A, XKRY2, XKRY, CDY2B, CDY2A, HSFY2, HSFY1, TTTY9B, TTTY9A, TTTY14, CD24, BCORP1, TXLNGY, KDM5D, TTTY10, EIF1AY, RPS4Y2, PRORY, RBMY2EP, RBMY1B, RBMY1A1, RBMY1E, RBMY1D, TTTY13, PRY2, PRY, LOC101929148, TTTY6, TTTY6B, RBMY1J, RBMY1F, TTTY5, RBMY2FP, LOC100652931, TTTY17B, TTTY17A, TTTY17C…
Loss	chr9	q21.11 - q31.1	71151735	105503014	613	-0.386862	1.315e-287	TMEM252, LINC01506, PIP5K1B, FAM122A, LOC101927069, PRKACG, FXN, TJP2, BANCR, FAM189A2, APBA1, PTAR1, C9orf135-AS1, C9orf135, MAMDC2, MAMDC2-AS1, SMC5-AS1, SMC5, KLF9, TRPM3, MIR204, TMEM2, ABHD17B, C9orf85, C9orf57, GDA, LINC01504, ZFAND5, TMC1, LINC01474, ALDH1A1, ANXA1, MIR6130, LOC101927358, RORB-AS1, RORB, TRPM6, C9orf40, C9orf41-AS1, CARNMT1, NMRK1, OSTF1, MIR548H3, PCSK5, RFK, RPSAP9, GCNT…
Loss	chr15	q11.2	22378084	22509254	4	-0.860895	3.638e-10	LOC101927079, OR4N4, OR4N3P

## Sheet: 14_F
Type	Chr	Cytoband	Start	Stop	#Probes	Amplification/Deletion	P_Value	Gene Names
Amplification	chr9	q34.11	131633235	131633294	1	2.15921	2.223e-13	CCBL1
Deletion	chr12	p13.31	9637323	9713425	2	-1.65607	7.343e-14
Gain	chr5	q14.3	90752354	90904104	2	0.726615	4.916e-11
Gain	chr7	p11.2	54676476	54676535	1	1.88347	1.895e-12
Gain	chr8	q21.11	75661636	75661695	1	1.60644	6.432e-10	MIR2052HG
Gain	chr9	p13.3	34611846	34611896	1	1.70893	5.333e-11	RPP25L
Gain	chr10	p13	14694155	14694214	1	1.94238	6.934e-13	FAM107B
Gain	chr11	p15.5 - p11.12	446754	51432742	965	0.343244	4.900e-324	PTDSS2, RNH1, HRAS, LRRC56, LMNTD2, RASSF7, MIR210HG, MIR210, LOC143666, PHRF1, IRF7, CDHR5, SCT, DRD4, DEAF1, TMEM80, EPS8L2, TALDO1, PDDC1, LOC171391, CEND1, SLC25A22, PANO1, PIDD1, RPLP2, SNORA52, PNPLA2, CRACR2B, CD151, POLR2L, TSPAN4, CHID1, AP2A2, MUC6, MUC2, MUC5AC, MUC5B, MIR6744, TOLLIP, TOLLIP-AS1, BRSK2, MOB2, DUSP8, KRTAP5-AS1, KRTAP5-1, KRTAP5-2, KRTAP5-3, KRTAP5-4, KRTAP5-5, FAM99A,…
Gain	chr11	q11 - q25	55246347	134868407	1780	0.350097	4.900e-324	OR4C15, OR4C16, OR4C11, OR4P4, OR4S2, OR4C6, OR5D13, OR5D14, OR5L1, OR5D18, OR5L2, OR5D16, TRIM51, OR5W2, OR5I1, OR10AG1, OR7E5P, OR5F1, OR5AS1, OR8I2, OR8H2, OR8H3, OR8J3, OR8K5, OR5J2, OR5T2, OR5T3, OR5T1, OR8H1, OR8K3, OR8K1, OR8J1, OR8U1, OR8U8, OR5R1, OR5M9, OR5M3, OR5M8, OR5M11, OR5M10, OR5M1, OR5AP2, OR5AR1, OR9G1, OR9G9, OR9G4, MIR6128, LOC101927120, OR5AK2, OR5AK4P, LRRC55, APLNR, TNKS1B…
Gain	chr15	q15.1	42758647	42758706	1	1.90712	1.583e-12	ZNF106
Gain	chr17	q24.2 - q25.1	64335128	71832461	144	0.030856	3.646e-53	PRKCA, PRKCA-AS1, MIR634, CACNG5, CACNG4, CACNG1, HELZ, PSMD12, PITPNC1, NOL11, SNORA38B, BPTF, C17orf58, KPNA2, LINC00674, LOC440461, AMZ2, ARSG, SLC16A6, PRKAR1A, WIPI1, MIR635, FAM20A, LINC01482, ABCA8, ABCA9, ABCA9-AS1, ABCA6, MIR4524B, MIR4524A, ABCA10, PRO1804, ABCA5, MAP2K6, LINC01483, LINC01497, LINC01028, KCNJ16, KCNJ2-AS1, KCNJ2, CASC17, LOC102723505, LINC01152, LOC102723517, SOX9-AS1, …
Gain	chr17	q25.3	75379116	78109158	77	0.005052	7.918e-27	SEPT9, MIR4316, LOC100507351, LOC100132174, FLJ45079, TNRC6C, TNRC6C-AS1, TMC6, TMC8, C17orf99, SYNGR2, TK1, AFMID, BIRC5, TMEM235, LOC100996291, SOCS3, LOC101928674, PGS1, DNAH17, DNAH17-AS1, LOC101928710, CYTH1, USP36, TIMP2, CEP295NL, LGALS3BP, CANT1, C1QTNF1-AS1, C1QTNF1, ENGASE, RBFOX3, MIR4739, HP09025, ENPP7, CBX2, CBX8, CBX4, LOC101928766, LOC101928738, TBC1D16, CCDC40, GAA, EIF4A3
Gain	chrY	p11.31 - p11.2	2656461	9148336	47	0.593074	2.66e-19	RPS4Y1, ZFY, LINC00278, TGIF2LY, PCDH11Y, TTTY23B, TTTY23, TSPY2, LINC00280, TTTY1, TTTY1B, TTTY2, TTTY2B, TTTY21, TTTY21B, TTTY7B, TTTY7, TTTY8B, TTTY8, AMELY, TBL1Y, PRKY, TTTY16, TTTY12, TTTY18, TTTY19, TTTY11
Gain	chrY	q11.21 - q11.23	14061053	28722435	126	0.340355	3.351e-27	GYG2P1, TTTY15, USP9Y, DDX3Y, UTY, TMSB4Y, VCY, VCY1B, NLGN4Y, NLGN4Y-AS1, FAM41AY1, FAM41AY2, FAM224B, FAM224A, XKRY2, XKRY, CDY2B, CDY2A, HSFY2, HSFY1, TTTY9B, TTTY9A, TTTY14, CD24, BCORP1, TXLNGY, KDM5D, TTTY10, EIF1AY, RPS4Y2, PRORY, RBMY2EP, RBMY1B, RBMY1A1, RBMY1E, RBMY1D, TTTY13, PRY2, PRY, LOC101929148, TTTY6, TTTY6B, RBMY1J, RBMY1F, TTTY5, RBMY2FP, LOC100652931, TTTY17B, TTTY17A, TTTY17C…
Loss	chr4	q21.1 - q35.2	78215223	190767114	1815	-0.526766	4.900e-324	CXCL13, CNOT6L, MRPL1, FRAS1, ANXA3, LINC01094, BMP2K, MIR5096, PAQR3, LINC01088, NAA11, GK2, LINC00989, PCAT4, ANTXR2, PRDM8, FGF5, C4orf22, BMP3, PRKG2, LOC101928942, RASGEF1B, HNRNPD, HNRNPDL, ENOPH1, TMEM150C, LINC00575, SCD5, MIR575, SEC31A, THAP9-AS1, SNORD143, SNORD144, THAP9, LIN54, COPS4, PLAC8, COQ2, HPSE, HELQ, MRPS18C, FAM175A, GPAT3, LOC101928978, NKX6-1, CDS1, WDFY3, WDFY3-AS2, ARHG…
Loss	chr5	q14.3 - q34	87734468	167072306	1326	-0.484082	4.900e-324	LOC102546226, LINC00461, MIR9-2, MEF2C, MEF2C-AS1, MIR3660, LINC01339, CETN3, LOC731157, MBLAC2, POLR3G, LYSMD3, ADGRV1, LUCAT1, ARRDC3, ARRDC3-AS1, NR2F1-AS1, NR2F1, MIR548AO, FAM172A, MIR2277, POU5F2, KIAA0825, SLF1, MCTP1, FAM81B, TTC37, ARSK, GPR150, RFESD, SPATA9, RHOBTB3, GLRX, LINC01554, ELL2, LOC101929710, MIR583, PCSK1, CAST, ERAP1, ERAP2, LNPEP, LIX1, RIOK2, LINC01340, RGMB, RGMB-AS1, C…
Loss	chr17	p13.3 - p11.2	87009	21445726	595	-0.398583	4.088e-263	RPH3AL, LOC100506388, C17orf97, FAM101B, VPS53, FAM57A, GEMIN4, DBIL5P, GLOD4, RNMTL1, NXN, TIMM22, ABR, MIR3183, BHLHA9, TUSC5, YWHAE, CRK, MYO1C, INPP5K, PITPNA-AS1, PITPNA, SLC43A2, SCARF1, RILP, PRPF8, TLCD2, MIR22HG, MIR22, WDR81, SERPINF2, SERPINF1, SMYD4, RPA1, RTN4RL1, DPH1, OVCA2, MIR132, MIR212, HIC1, SMG6, LOC101927839, SRR, TSR1, SNORD91B, SNORD91A, SGSM2, MNT, LOC284009, METTL16, PAF…
Loss	chr17	q11.1 - q25.3	25403446	80085443	1502	-0.322833	4.900e-324	MIR4522, WSB1, TBC1D3P5, KSR1, LGALS9, NOS2, LYRM9, NLK, PYY2, PPY2P, KRT18P55, TMEM97, IFT20, TNFAIP1, POLDIP2, TMEM199, MIR4723, SEBOX, VTN, SARM1, SLC46A1, SLC13A2, FOXN1, UNC119, PIGS, ALDOC, SPAG5, SPAG5-AS1, SGK494, KIAA0100, SDF2, SUPT6H, PROCA1, RAB34, NARR, RPL23A, SNORD42B, SNORD4A, SNORD42A, SNORD4B, TLCD1, NEK8, TRAF4, FAM222B, ERAL1, MIR451A, MIR451B, MIR144, MIR4732, FLOT2, DHRS13, …

## Sheet: 18_F
Type	Chr	Cytoband	Start	Stop	#Probes	Amplification/Deletion	P_Value	Gene Names
Deletion	chr2	p16.3	52750512	52750571	1	-3.82932	4.094e-12
Deletion	chr4	p15.1	31768439	31768498	1	-1.63507	9.864e-11
Gain	chr6	q12	66497520	66497579	1	1.73272	4.025e-10

## Sheet: 25_F
Type	Chr	Cytoband	Start	Stop	#Probes	Amplification/Deletion	P_Value	Gene Names
Amplification	chr8	q24.13 - q24.21	126230204	130653996	63	2.34278	0	4.900e-324	NSMCE2, TRIB1, LINC00861, LOC101927657, FAM84B, PCAT1, PCAT2, PRNCR1, CASC19, CCAT1, CASC21, CASC8, CCAT2, POU5F1B, CASC11, MYC, PVT1, MIR1204, TMEM75, MIR1205, MIR1206, MIR1207, MIR1208, LINC00824, LINC00977, CCDC26, MIR3686
Deletion	chr4	q13.1	66356902	66391688	2	-1.97361	1.635e-10	EPHA5
Gain	chr10	q23.31	91003227	91386618	12	0.829443	6.827e-11	LIPA, IFIT2, IFIT3, IFIT1B, IFIT1, IFIT5, SLC16A12, SLC16A12-AS1, PANK1, MIR107

[truncated: 23 more sheets: 26_F, 27_F, 28_F, 29_F, 31_F, 32_F, 4_M, 5_M, 6_M, 8_M, 9_M, 10_M, 11_M, 15_M, 16_M, 17_M, 19_M, 20_M, 21_M, 22_M …]
